# Supplementary material for: Bi-metallic [Cu/Co(6mna)2]n metal organic chalcogenolate frameworks as high-performance electro-catalysts for dye-sensitized solar cells: a ligand-assisted bottom-up synthesis
Source: Royal Society of Chemistry journal article supplement (doi:10.1039/d3ta04970a), 2023-12-04
Supplement: d3ta04970a1.pdf [file d3ta04970a1.pdf]

## Electronic Supplementary Information

### **Bi-metallic [Cu/Co(6mna)<sub>2</sub>]<sub>n</sub> metal organic chalcogenolate framework as high-performance electro-catalyst for dye-sensitized solar cells: A ligand-assisted bottom-up synthesis**

Chun-Wei Lai<sup>a,+</sup>, Yu-Chien Lee<sup>a,+</sup>, Yi-Zhen Jiang<sup>a</sup>, Chia-Her Lin<sup>a</sup>,

Gautam Kumar<sup>b</sup>, Michael H. Huang<sup>b</sup>, and Chun-Ting Li<sup>a,\*</sup>

<sup>a</sup> *Department of Chemistry, National Taiwan Normal University, Taipei 11677, Taiwan;* <sup>b</sup> *Department of Chemistry and Frontier Research Center on Fundamental and Applied Sciences of Matters, National Tsing Hua University, Hsinchu 300044, Taiwan.*

\*Corresponding author: Tel.: +886–2–7749–6146;

Fax: +886–2–2932–4249; E-mail: [ctli@gapps.ntnu.edu.tw](mailto:ctli@gapps.ntnu.edu.tw)

## 1. Materials

**Conducting substrate:** Fluorine-doped tin oxide (FTO, TEC-7,  $7 \Omega \text{ sq.}^{-1}$ ) conducting glass was purchased from NSG America, Inc., New Jersey, USA. Carbon cloth (CC, W0S1002, thickness = 0.36 mm, basic 15 weight =  $120 \text{ g cm}^{-2}$ , sheet resistance =  $0.60 \Omega \text{ sq.}^{-1}$ ) was bought from CeTech Co., Ltd., Taiwan. **Photoanode:** Titanium (IV) tetraisopropoxide (TTIP, > 98%) and 2-methoxyethanol ( $\geq 99.5\%$ ) were obtained from Sigma Aldrich. Titanium (IV) chloride ( $\text{TiCl}_4$ , >99.9%) was obtained from Acros Organics B.V.B.A. Transparent  $\text{TiO}_2$  paste (TL paste, Ti-nanoxide HT/SP, 20 nm) and surlyn<sup>®</sup> (SX1170-60, 60  $\mu\text{m}$ ) were supplied by Solaronix S.A., Aubonne, Switzerland. Commercial light scattering  $\text{TiO}_2$  particles, ST-41 with an averaged diameter of 200 nm, were obtained from Ishihara Sangyo, Ltd., Japan. Poly(ethylene glycol) (PEG, MW~20,000) were purchased from Merck. Cis-diisothiocyanato-bis(2,2'-bipyridyl-4,4'-dicarboxylato) ruthenium (II) bis(tetrabutylammonium) (N719 dye) were supplied by Luminescence Tech. Corp., Taiwan. **Electrolyte:** Lithium iodide (LiI, synthetical grade) and iodine ( $\text{I}_2$ , synthetical grade) were purchased from Merck. 1,2-Dimethyl-3-propylimidazolium iodide (DMPII) was procured from Tokyo Chemical Industry Co., Ltd. Guanidinium thiocyanate ( $\text{GuSCN}$ ,  $\geq 99\%$ ) and 4-tert-butylpyridine (tBP, 96%) were bought from Acros. Lithium perchlorate ( $\text{LiClO}_4$ ,  $\geq 98.0\%$ ) was obtained from Sigma Aldrich. Tris(1,10-phenanthroline)cobalt(II) bis(trifluoromethanesulfonimide) and tris(1,10-phenanthroline)cobalt(III) tri(trifluoromethanesulfonimide) were synthesized in accordance with our previous studies.<sup>1</sup> Bis(2,9-dimethyl-1,10-phenanthroline)copper(I) trifluoromethanesulfonimide and bis(2,9-dimethyl-1,10-phenanthroline)copper(II) bis(trifluoromethanesulfonimide) were synthesized by a reported procedure.<sup>2</sup> **Solvent:** Acetone (99%) and tert-butyl alcohol (tBA, 96%) were bought from Acros. 3-Methoxypropionitrile (MPN, 99%) was procured from Alfa Aesar. Acetonitrile (MeCN, 99.99%) and dichloromethane (DCM,  $\geq 99.8\%$ ) were received from J. T. Baker. *N,N*-Dimethylformamide (DMF,  $\geq 99.8\%$ ), ethanol (EtOH, 99.5%), and isopropyl alcohol (IPA, 99.5%) were obtained from Sigma Aldrich. **MOF synthesis:** Copper (II) nitrate hydrate ( $\text{Cu}(\text{NO}_3)_2 \cdot 2.5\text{H}_2\text{O}$ , 98%) was obtained from Honeywell Research Chemicals International Inc., USA. 6,6'-Dithiodinicotinic acid ( $\text{H}_2\text{dtdn}$ , >98%) was obtained from Tokyo Chemical Industry Co., Ltd. Pyrazine (Pyz, >99%) was obtained from Thermo Fisher Scientific Inc. 6-Mercaptopyridine-3-carboxylic acid (6mna, >90%) was obtained from Sigma Aldrich. Cobalt (II) chloride hexahydrate ( $\text{CoCl}_2 \cdot 6\text{H}_2\text{O}$ ) and cobalt (II) nitrate hexahydrate ( $\text{Co}(\text{NO}_3)_2 \cdot 6\text{H}_2\text{O}$ ) were procured from Alfa Aesar.

## 2. Fabrication of the DSSCs

Conducting substrate, FTO and carbon cloth, were cleaned with a neutral cleaner and then washed with de-ionized water, acetone, and isopropanol sequentially. A mesoporous  $\text{TiO}_2$  photoanode (with an working area of  $0.20 \text{ cm}^2$ ) was coated on a cleaned FTO by the following procedures. (1) The first  $\text{TiO}_2$  compact layer (~100 nm) was spin-coated on FTO under 3000 rpm for 30 s using a precursor solution of TTIP/2-methoxyethanol with a weight ratio of 1/3. (2) The second  $\text{TiO}_2$  transparent layer (~10  $\mu\text{m}$ ) was doctor-bladed onto the first layer using the commercial TL paste purchased from Solarnix. (3) The third  $\text{TiO}_2$  scattering layer (~4  $\mu\text{m}$ ) was doctor-bladed onto the second layer using a reported home-made paste<sup>1</sup>. (4) Last, the  $\text{TiO}_2$  thin film was treated by a 70 mM of  $\text{TiCl}_4$  solution

(with a solvent) at 70 °C for 30 min in a mixing solvent of deionc water/ethanol (v/v=9/1). The TiO<sub>2</sub> layer made by every step would be followed by a sintering process at 500 °C for 30 min in an ambient atmosphere. After the sintering process, the TiO<sub>2</sub> photoanode was immersed in a 5.0×10<sup>-4</sup> M of N719 dye solution using a mixed solvent of MeCN/tBA with a volume ratio of 1:1 at room temperature for 24 h. A TiO<sub>2</sub> photoanode was coupled with a counter electrode made by this work. And the cell gap was maintained by using a 60 μm-thick Surlyn<sup>®</sup> film as the spacer.

### 3. Material characterizations

Crystallinity and molecular structure of as-synthesized MOF particle were analyzed by powder X-ray diffraction pattern spectroscopy (PXRD, Bruker D8 advance, Billerica, USA) and single crystal X-ray diffraction pattern spectroscopy (SCXRD, Bruker D8 venture, Billerica, USA). Nitrogen-gas (N<sub>2</sub>) adsorption-desorption isotherms for various MOF powders were investigated by Micromeritics 3Flex Adsorption Analyzer Georgia USA. Film morphology was observed by field-emission scanning electron microscopy (FE-SEM, Nova NanoSEM 230, FEI, Oregon, USA).

### 4. Photovoltaic performance measurement

Photovoltaic parameters of the DSSCs with different counter electrodes were obtained by a potentiostat/galvanostat (Metrohm Autolab PGSTAT204, Autolab, Eco-Chemie, the Netherlands) at the simulated solar irradiation (100 mW cm<sup>-2</sup>; AM 1.5G) and Philip desk lamp (Helix 23WD EMI lamp; a correlated color temperature of 6500K; 6, 3, and 1 klux). The simulated solar irradiation was performed by a class A quality solar simulator (PEC-L11, AM1.5G, Peccell Technologies, Inc., Kanagawa, Japan). The incident light intensity was calibrated by a standard Si cell (PECSI01, Peccell Technologies, Inc.) and by an optical detector (model 818-SL, Newport, California, USA) coupled with a power meter (model 1916-R, Newport, California, USA). The DSSC device was composed of a sandwich structure of photoanode/ electrolyte/ counter electrode; where an indential TiO<sub>2</sub> film adsorbed with N719 sensitizer was the photoanode, an liquid iodide-based mixture was the electrolyte, and the different electrodes made by this work were used as the counter electrodes. Here, the iodide-based electrolyte contained 1.2 M DMPII, 0.035 M I<sub>2</sub>, 0.1 M GuSCN, and 0.5 M tBP in MPN/MeCN (volume ratio of 1:4) and was injected into the gap between photoanode and counter electrode by capillarity.

### 5. Cyclic voltammetry (CV) analysis

CV analysis was executed by a potentiostat/galvanostat (Metrohm Autolab PGSTAT204, Autolab, Eco-Chemie, the Netherlands) using a three-electrode system. The sample electrode was used as the working electrode. A Pt foil and Ag/Ag<sup>+</sup> electrode were used as the auxiliary and reference electrodes, respectively. For the measurements of I<sup>-</sup>/I<sub>3</sub><sup>-</sup> redox mediator, the iodide-based electrolyte contained 10.0 mM of LiI, 1.0 mM of I<sub>2</sub>, and 0.1 M of LiClO<sub>4</sub> in acetonitrile. For the measurements of Co-phen<sup>2+</sup>/Co-phen<sup>3+</sup> redox mediator, the cobalt-based electrolyte contained 10.0 mM of tris(1,10-phenanthroline)cobalt(II) bis(trifluoromethanesulfonimide), 1.0 mM of tris(1,10-phenanthroline)-cobalt(III) tri(trifluoromethanesulfonimide), and 0.1 M LiClO<sub>4</sub> in acetonitrile. For the measurements

of Cu-dmp<sup>+</sup>/Cu-dmp<sup>2+</sup> redox mediator, the copper-based electrolyte contained 10.0 mM of bis(2,9-dimethyl-1,10-phenanthroline)copper(I) trifluoromethanesulfonimide, 1.0 mM of bis(2,9-dimethyl-1,10-phenanthroline)copper(II) bis(trifluoromethanesulfonimide), and 0.1 M of LiClO<sub>4</sub> in acetonitrile. The scan rate for CV analysis was performed at 20, 40, 60, 80, or 100 mV s<sup>-1</sup>.

## 6. Tafel polarization plot, and electrochemical impedance spectra

Tafel polarization plots and electrochemical impedance spectra (EIS) analyses were recorded a potentiostat/galvanostat (Metrohm Autolab PGSTAT204, Autolab, Eco-Chemie, the Netherlands) equipped with a FRA2 module by using a symmetrical cell structure of electrode/electrolyte/electrode; where an electrode made by this work was applied for both anode and cathode. The electrolyte for Tafel and EIS analyses contained 1.2 M DMPH, 0.035 M I<sub>2</sub>, 0.1 M GuSCN, and 0.5 M tBP in MPN/MeCN (volume ratio of 1:4). For Tafel measurement, linear sweep voltammetry (LSV) was performed from 1 V to -1 V at a DC bias with a scan rate of 100 mV s<sup>-1</sup>. A Tafel polarization curve is presented as a logarithm of current density–voltage (log *J*–*V*) curve, which is generally divided into three zones: (1) the polarization zone for forming an electrical double layer at  $|V| < 120$  mV, (2) the Tafel zone for executing charge transfer at  $120 \text{ mV} < |V| < 400$  mV, and (3) the diffusion zone for reaching a horizontal limiting current at  $|V| > 400$  mV. Accordingly, a linear fitting line is obtained at the anodic or cathodic Tafel zone to find the exchanged current density (*J*<sub>0</sub>; mA cm<sup>-2</sup>) at the intercept (at *V* = 0). In a region of log  $|J_0| \pm 0.2$  mA cm<sup>-2</sup>, a Tafel slope ( $\beta$ ; mV decade<sup>-1</sup>) for each sample is acquired by another linear fitting line, which is commonly presented as a voltage–logarithm of current density (*V*–log *J*) curve.

For EIS analysis, the data was collected using the same dummy cell as for Tafel analysis under an AC amplitude of  $\pm 10$  mV, an AC frequency from 1 Hz to 100 kHz, and an applied bias of 0 V. A Nyquist plot is presented as the imaginary impedance–real impedance (-*Z''*–*Z'*) spectra, which is typically divided into three regions: (1) high-frequency region of 10<sup>5</sup> ~ 10<sup>4</sup> Hz at the left-hand-side onset point, referring to the series resistance (*R*<sub>s</sub>) at the electro-catalytic film/substrate interface; (2) middle-frequency region of 10<sup>4</sup> ~ 10<sup>3</sup> Hz for collecting the radius of the left-hand-side semi-circle, referring to the charge transfer resistance (*R*<sub>ct</sub>) at the electro-catalytic film/electrolyte interface; (3) low-frequency region of 10<sup>3</sup> ~ 10<sup>0</sup> Hz for getting the diameter of right-hand-side semi-circle, referring to Warburg diffusion resistance (*Z*<sub>W</sub>) within the electrolyte layer.

**Table S1** A partial list of the DSSC performance with MOF-based counter electrodes, based on the device using a photoanode of TiO<sub>2</sub>/N719 and an I<sup>-</sup>/I<sub>3</sub><sup>-</sup> electrolyte.

| Ligands                      | Counter Electrode                                                                             | $\eta$<br>[%] | $\eta$ of Pt<br>[%] | Ref.      |
|------------------------------|-----------------------------------------------------------------------------------------------|---------------|---------------------|-----------|
| <u>Imidazole</u>             | FTO/ZIF-67/ethyl cellulose                                                                    | 2.9           | 7.9                 | 3         |
|                              | FTO/ZIF-67 derived CoS <sub>2</sub> /carbon nanocage                                          | 8.2           |                     |           |
|                              | FTO/ZIF-67 derived CoTe <sub>2</sub> /N-doped CNT-grafted polyhedron                          | 9.0           | 8.0                 | 4         |
|                              | FTO/ZIF-67 derived CoTe <sub>2</sub> /N-doped graphitic carbon-coated polyhedron              | 8.6           |                     |           |
|                              | FTO/ZIF-67 derived Co-doped MoS <sub>x</sub> hollow nanobox                                   | 9.6           | 8.4                 | 5         |
|                              | FTO/ ZIF-67 derived CoSe <sub>2</sub> /N-doped CNT                                            | 9.3           | 7.8                 | 6         |
|                              | FTO/(ZIF-8/ZIF-67) derived Ni/Co-embedded N-doped carbon polyhedron/CNT                       | 8.8           | 7.3                 | 7         |
|                              | FTO/ZIF-8/PEDOT:PSS                                                                           | 7.0           | 7.2                 | 8         |
|                              | FTO/ZIF-8/PEDOT:PSS                                                                           | 5.7           | 8.5                 | 9         |
|                              | FTO/(ZIF-8@SiO <sub>2</sub> ) derived yolk-shell (N-doped carbon@SiO <sub>2</sub> )/PEDOT:PSS | 10.0          |                     |           |
|                              | FTO/ZIF-8 derived N-doped carbon                                                              | 8.3           | 8.9                 | 10        |
|                              | FTO/(ZIF-8@polydopamine) derived N-doped carbon                                               | 9.0           |                     |           |
|                              | FTO/ZIF-7/PEDOT:PSS                                                                           | 5.3           | 8.3                 | 11        |
|                              | FTO/ZIF-7 derived ZnSe/N-doped carbon cube/PEDOT:PSS                                          | 8.7           |                     |           |
| <u>BDC<br/>(or BTC)</u>      | FTO/Co-BDC derived CoSe <sub>2</sub> (spin-coated)                                            | 6.9           | 6.4                 | 12        |
|                              | FTO/Co-BDC derived CoSe <sub>2</sub> (bottom-up grown)                                        | 5.8           |                     |           |
|                              | FTO/Zn-BTC derived ZnO-doped carbon                                                           | 7.7           | 9.4                 | 13        |
|                              | FTO/(Co-BTC/Ni-BTC) derived carbon decorated Co/Ni alloy                                      | 9.3           | 8.0                 | 14        |
| <u>TCPP</u>                  | FTO/Co-TCPP derived CoS <sub>1.097</sub> @N-doped carbon                                      | 9.1           | 8.0                 | 15        |
|                              | CC/Zr-TCPP/s-PT                                                                               | 8.9           | 8.2                 | 16        |
|                              | FTO/annealed Zn-TCPP                                                                          | 5.6           | 6.7                 | 17        |
| <u>Mercaptopronicotinate</u> | FTO/[Cu <sub>2</sub> (6mna)(6mn)NH <sub>4</sub> ] <sub>n</sub> /PEDOT                         | 8.3           | 7.7                 | 18        |
|                              | CC/[Cu <sub>2</sub> (6mna)(6mn)NH <sub>4</sub> ] <sub>n</sub> /PEDOT                          | 9.5           | N.A.                |           |
|                              | CC/[Cu <sub>2</sub> (6mna)(6mn)NH <sub>4</sub> ] <sub>n</sub> -NO <sub>3</sub>                | 9.4           | 9.3                 | This work |
|                              | CC/[Co <sub>2</sub> (6mna) <sub>2</sub> ] <sub>n</sub> -NO <sub>3</sub>                       | 9.4           |                     |           |
|                              | CC/[Co <sub>2</sub> (6mna) <sub>2</sub> ] <sub>n</sub> -Cl                                    | 9.9           |                     |           |
|                              | CC/[Cu/Co(6mna) <sub>2</sub> ] <sub>n</sub> -NO <sub>3</sub>                                  | 9.8           |                     |           |
|                              | CC/[Cu/Co(6mna) <sub>2</sub> ] <sub>n</sub> -Cl                                               | 10.0          |                     |           |

CNT= carbon nanotube; PEDOT= poly(3,4-ethylenedioxythio-phenene); PEDOT:PSS= poly(3,4-ethylenedioxythio-phenene): poly(styrene-sulfonate); s-PT= sulfonated-poly(thiophene-3-[2-(2-methoxyethoxy) ethoxy]-2,5-diyl); 6mna= 6-mercaptonicotinic acid; 6mn= 6-mercaptonicotinate.

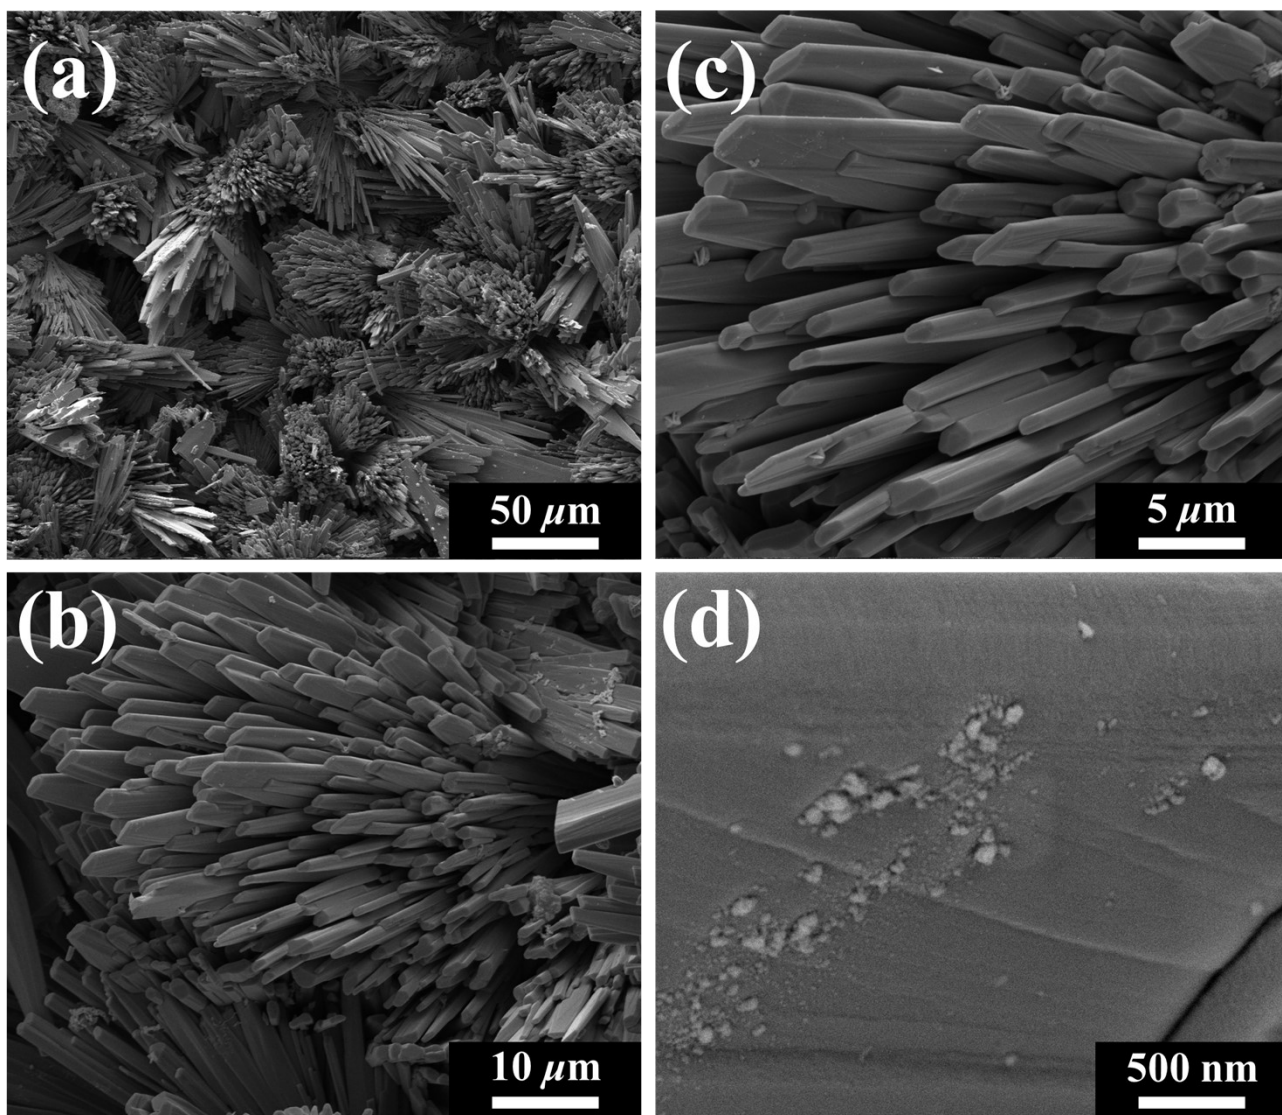

**Fig. S1** FE-SEM images of the  $\text{CC}/[\text{Cu}_2(6\text{mna})(6\text{mn})\text{NH}_4]_n\text{-NO}_3$  electrode synthesized by 72 h, recorded at the magnification of (a) 1 k, (b) 5 k, (c) 10 k, and (d) 100 k.

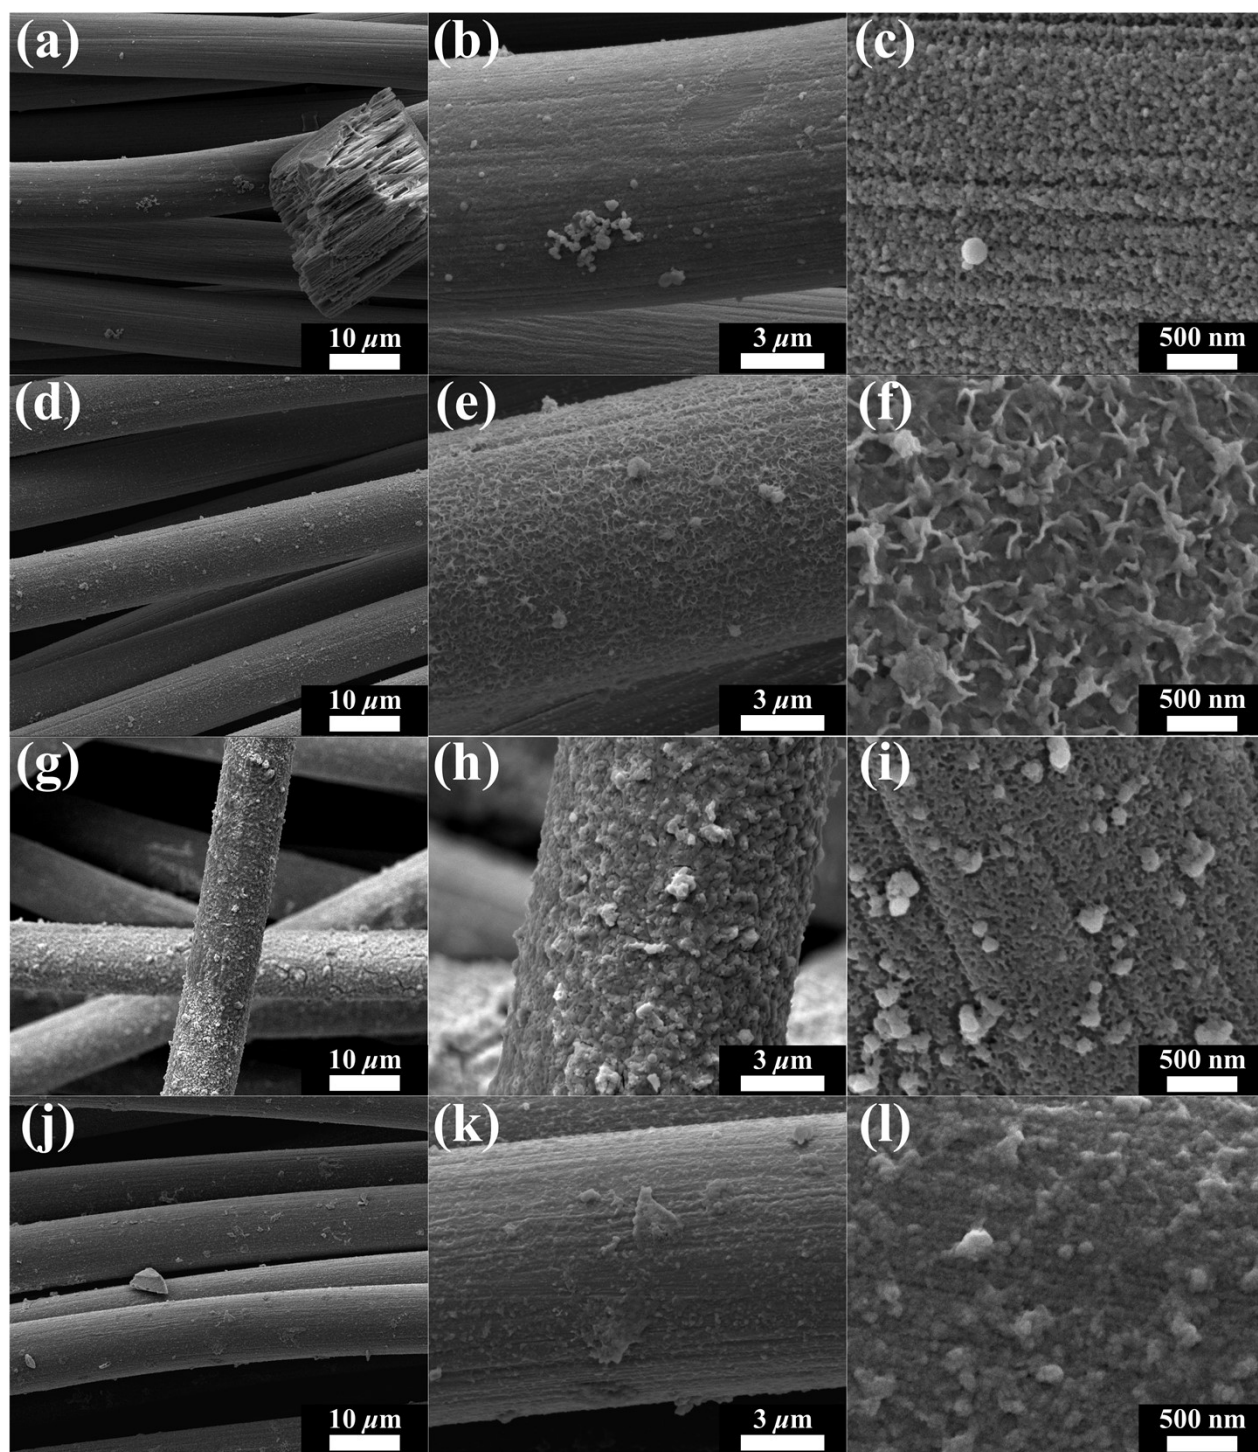

**Fig. S2** FE-SEM images of various CC/[Co<sub>2</sub>(6mna)<sub>2</sub>]<sub>n</sub>-NO<sub>3</sub> electrodes, synthesized by the reaction time of (a-c) 20, (d-f) 48, (g-i) 72, and (j-l) 96 h.

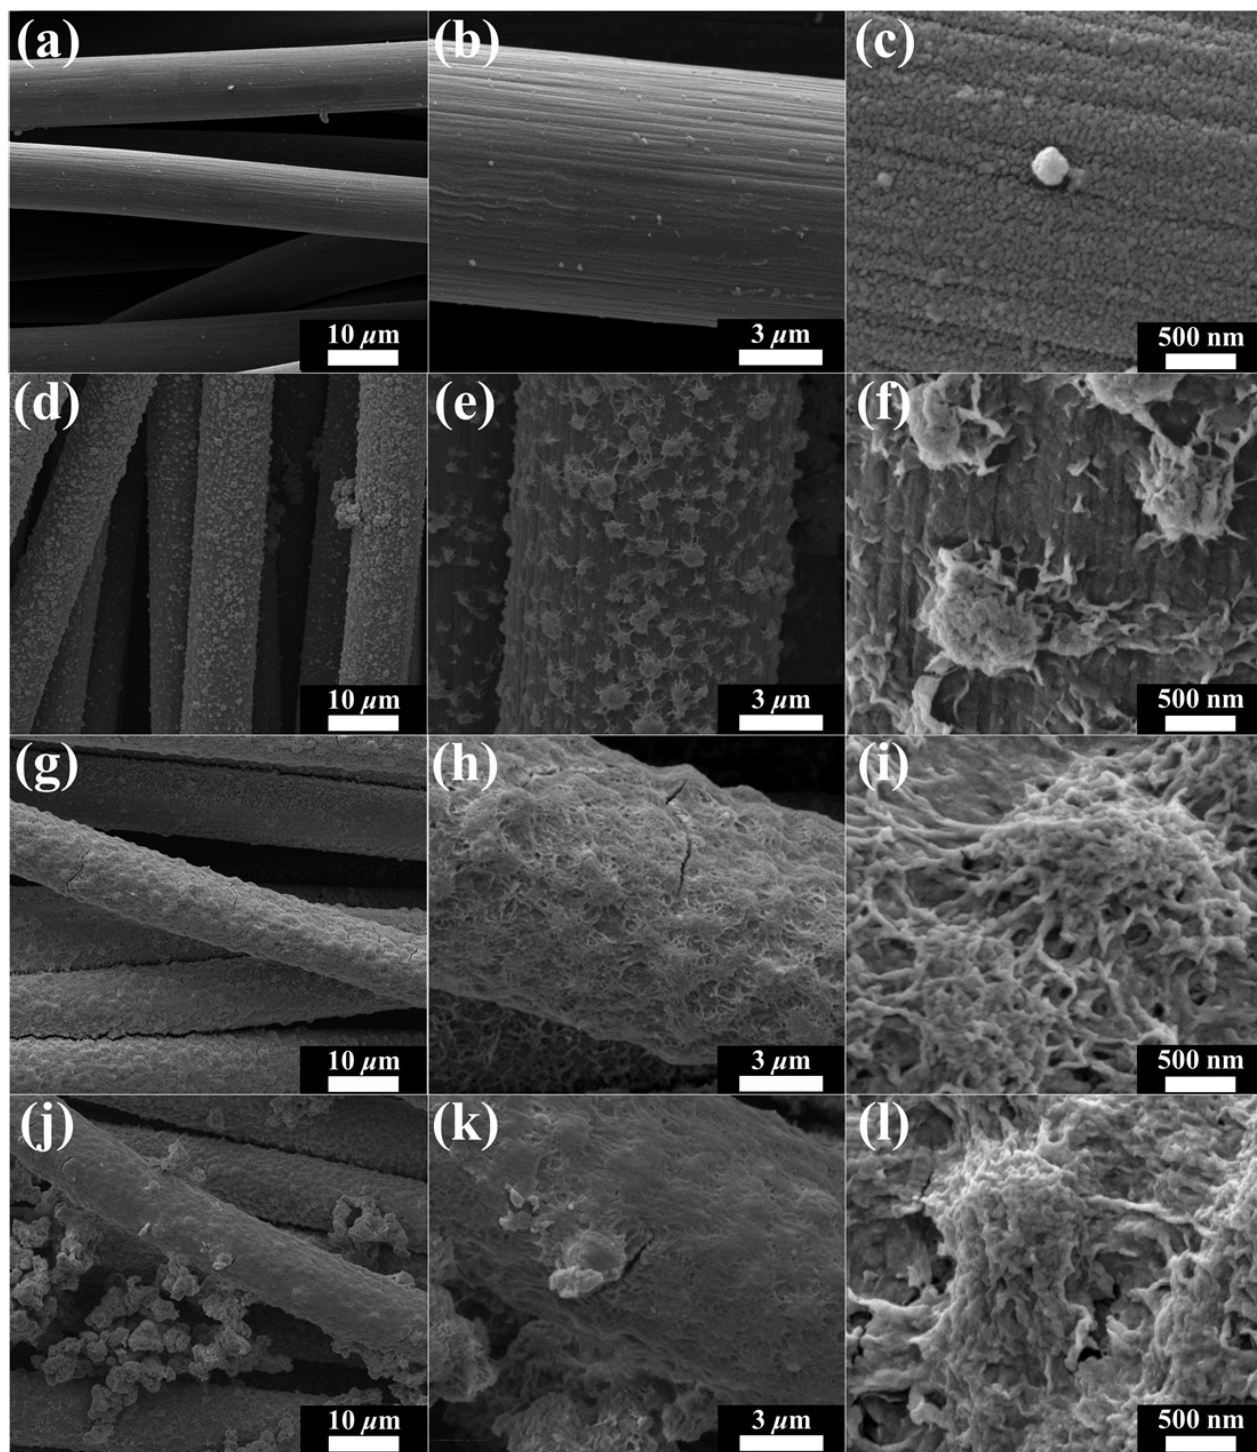

**Fig. S3** FE-SEM images of various  $\text{CC}/[\text{Co}_2(6\text{-mna})_2]_n\text{-Cl}$  electrodes, synthesized by the reaction time of (a-c) 20, (d-f) 48, (g-i) 72, and (j-l) 96 h.

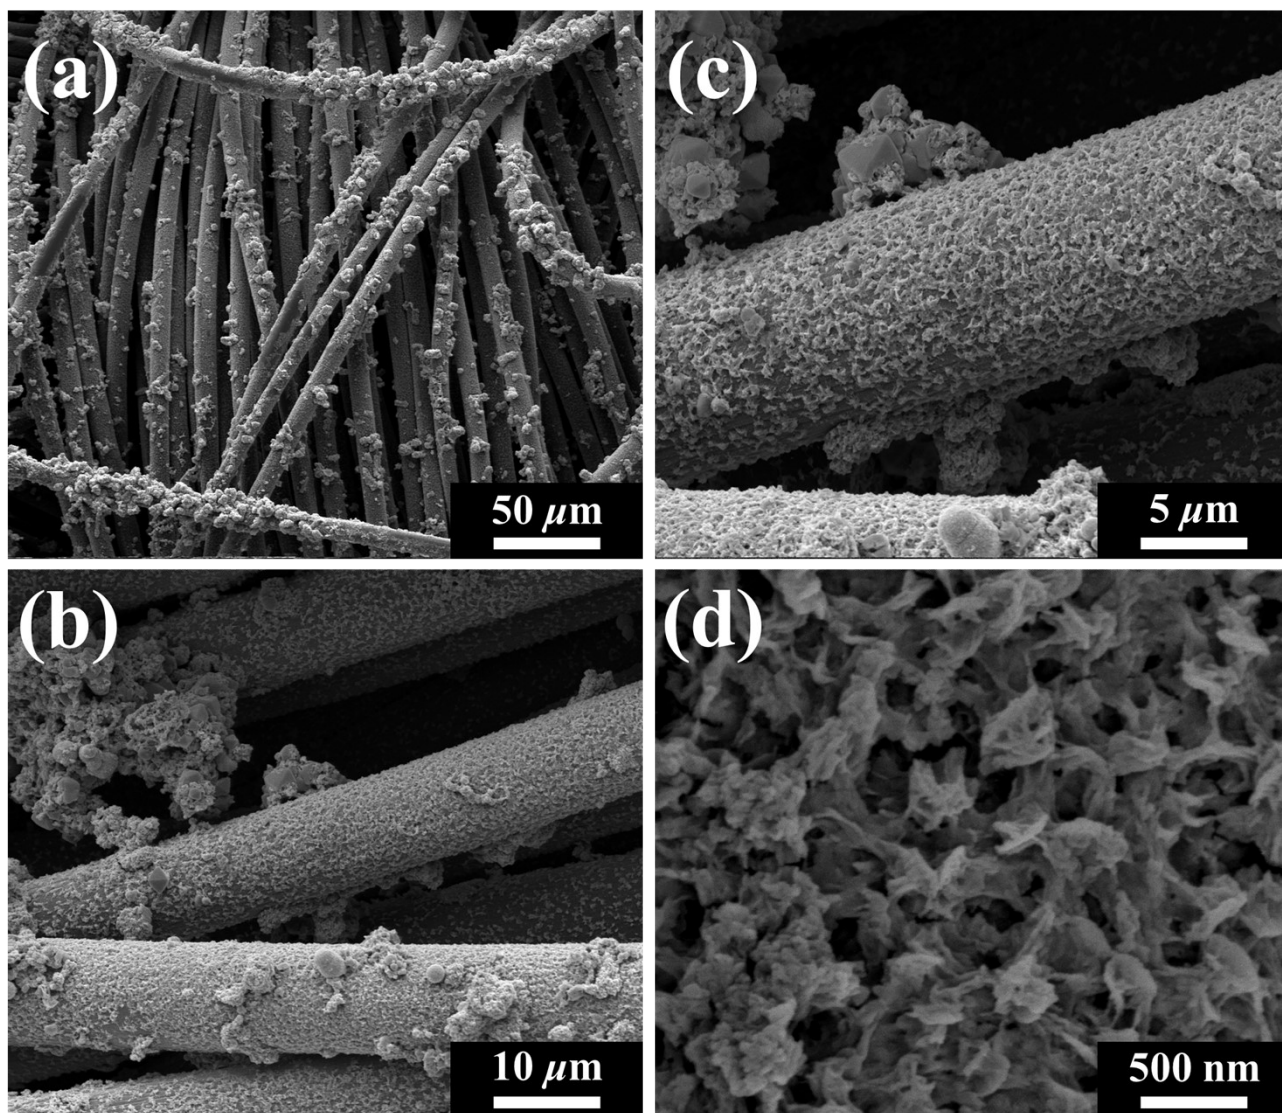

**Fig. S4** FE-SEM images of the  $\text{CC}/[\text{Cu}/\text{Co}(\text{6mna})_2]_n\text{-NO}_3$  electrode synthesized by 72 h, recorded at the magnification of (a) 1 k, (b) 5 k, (c) 10 k, and (d) 100 k.

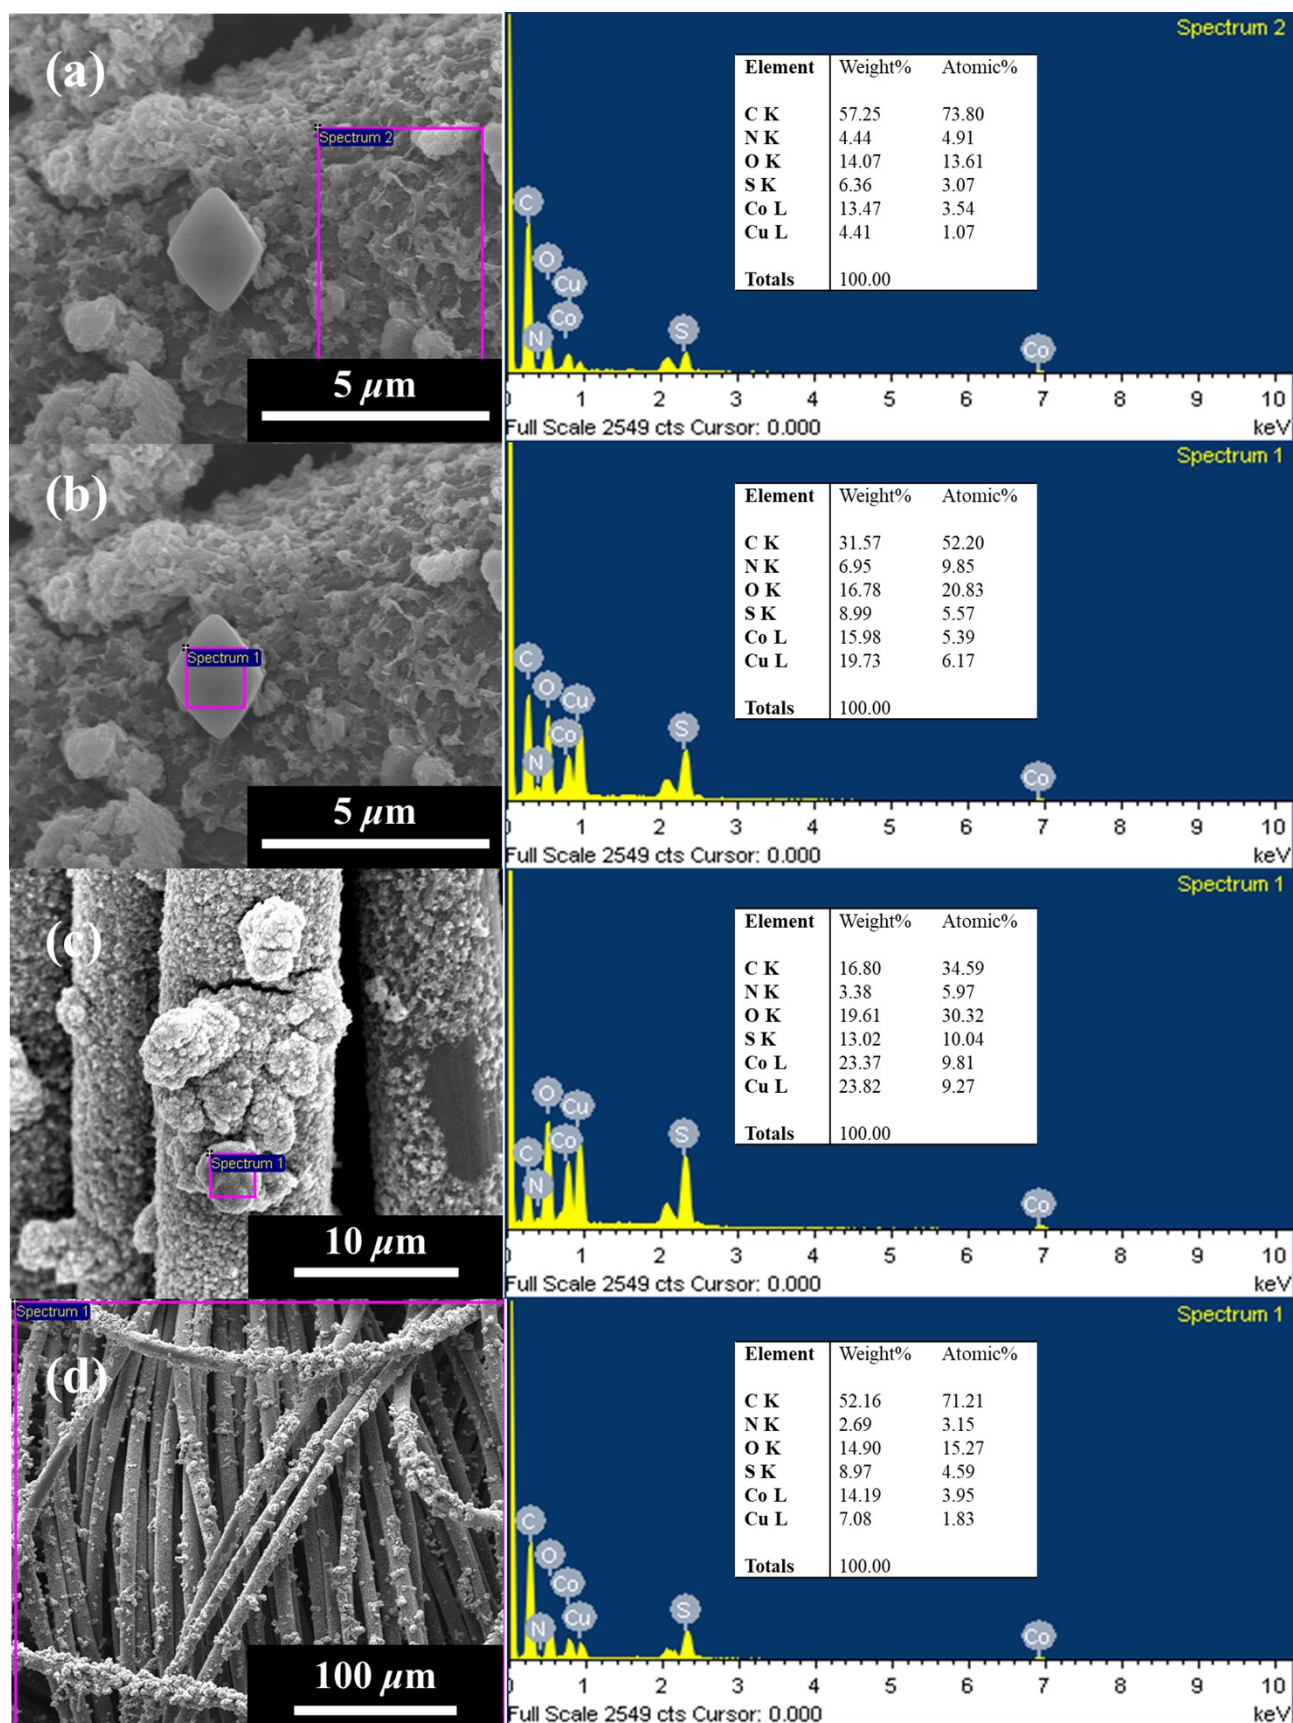

**Fig. S5** EDAX spectra of the CC/[Cu/Co(6mna)<sub>2</sub>]<sub>n</sub>-NO<sub>3</sub> electrode synthesized by 72 h, recorded at (a) silk-like particles, (b) sharp octahedrons, (c) irregular chunks, and (d) bulk film.

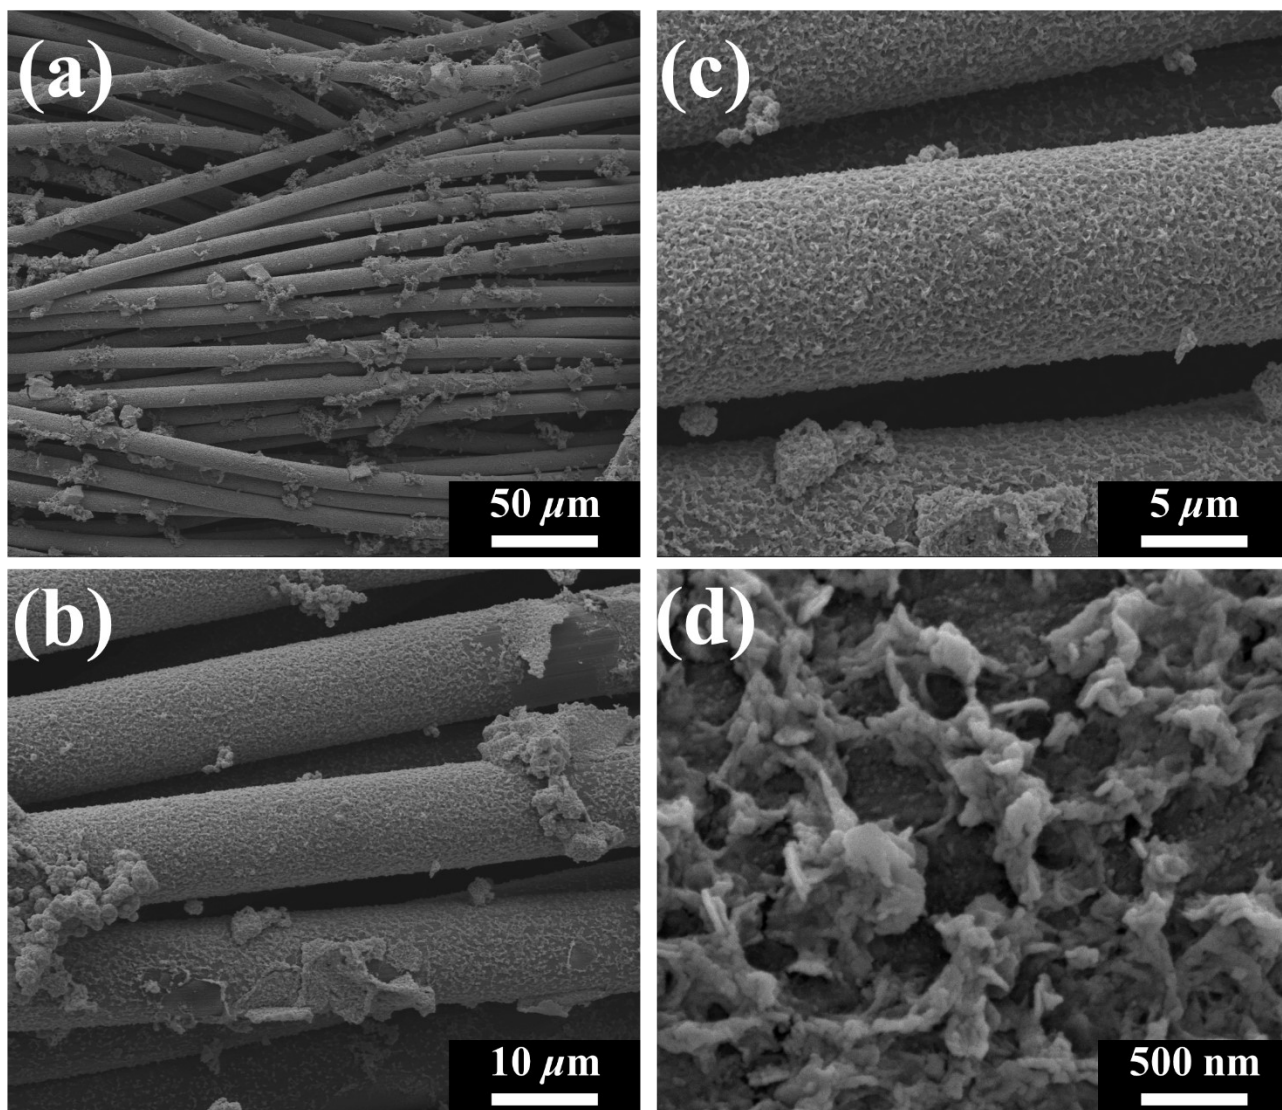

**Fig. S6** FE-SEM images of the CC/[Cu/Co(6mna)<sub>2</sub>]<sub>n</sub>-Cl electrode synthesized by 72 h, recorded at the magnification of (a) 1 k, (b) 5 k, (c) 10 k, and (d) 100 k.

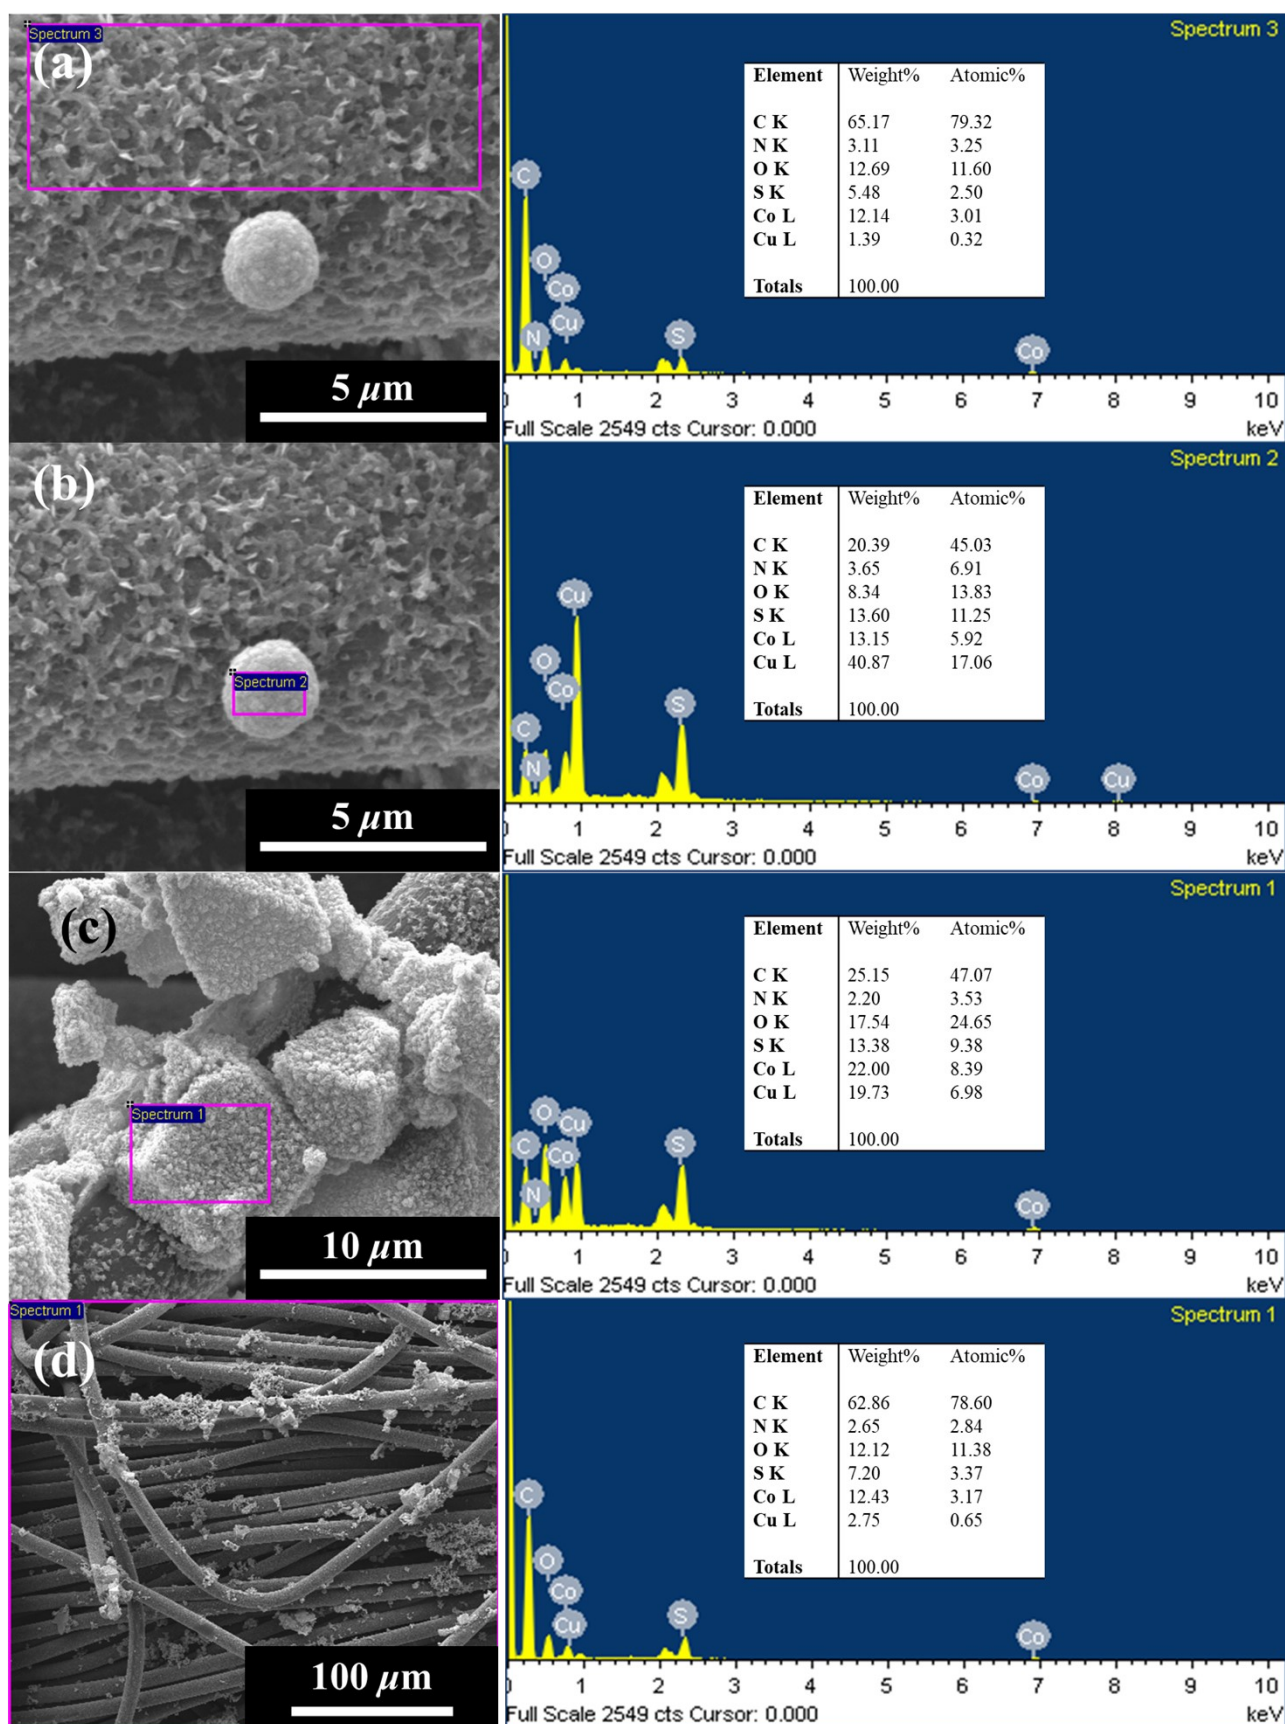

**Fig. S7** EDAX spectra of the CC/[Cu/Co(6mna)<sub>2</sub>]<sub>n</sub>-Cl electrode synthesized by 72 h, recorded at (a) flower-like particles, (b) spherical particles, (c) irregular aggregations, and (d) bulk film.

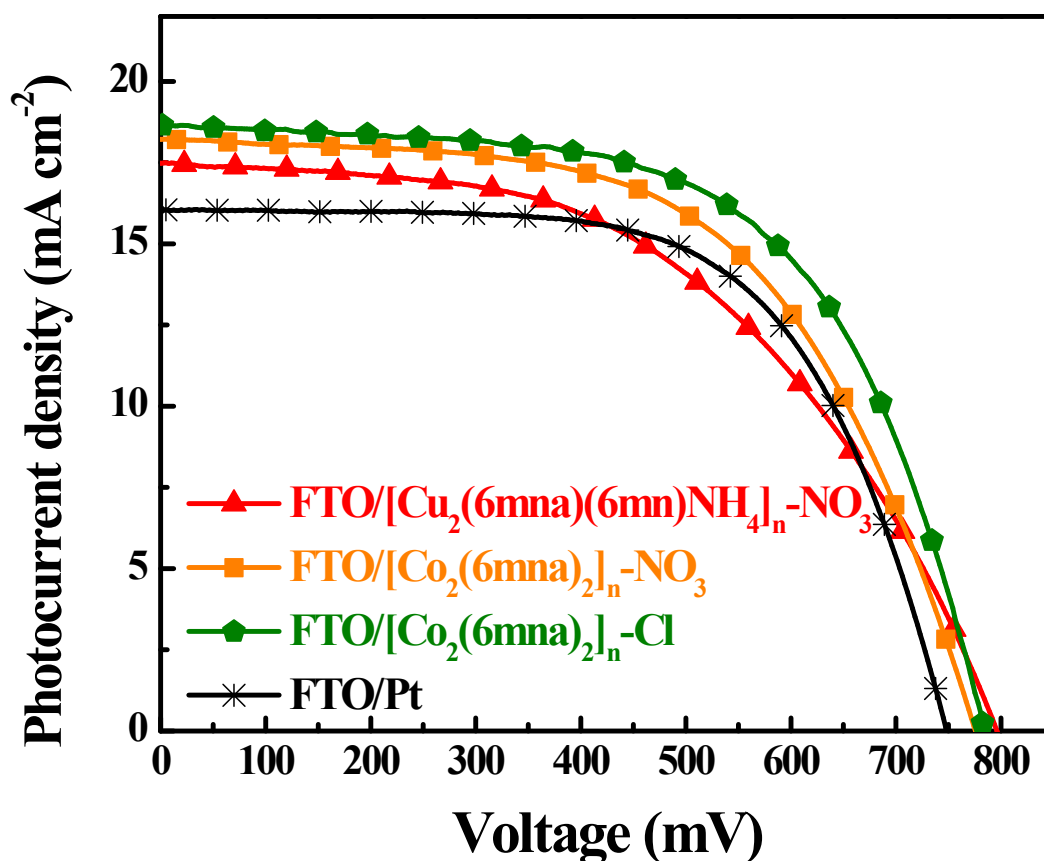

**Fig. S8** Photocurrent density–voltage curves of DSSCs coupled with various counter electrodes of FTO/[Cu<sub>2</sub>(6mna)(6mn)NH<sub>4</sub>]<sub>n</sub>-NO<sub>3</sub>, CC/[Co<sub>2</sub>(6mna)<sub>2</sub>]<sub>n</sub>-NO<sub>3</sub>, FTO/[Cu/Co(6mna)<sub>2</sub>]<sub>n</sub>-NO<sub>3</sub>, and FTO/Pt, measured at a simulated AM 1.5G solar illumination (100 mW cm<sup>-2</sup>, AM 1.5G).

**Table S2** Photovoltaic parameters of DSSCs coupled with various counter electrodes of FTO/[Cu<sub>2</sub>(6mna)(6mn)NH<sub>4</sub>]<sub>n</sub>-NO<sub>3</sub>, CC/[Co<sub>2</sub>(6mna)<sub>2</sub>]<sub>n</sub>-NO<sub>3</sub>, FTO/[Cu/Co(6mna)<sub>2</sub>]<sub>n</sub>-NO<sub>3</sub>, and FTO/Pt. The standard deviation data for each sample is measured at the simulated solar irradiation (100 mW cm<sup>-2</sup>, AM 1.5G) using ten independent devices.

| Electrode                                                                       | $\eta$<br>(%) | $V_{oc}$<br>(mV) | $J_{sc}$<br>(mA cm <sup>-2</sup> ) | $FF$        |
|---------------------------------------------------------------------------------|---------------|------------------|------------------------------------|-------------|
| FTO/[Cu <sub>2</sub> (6mna)(6mn)NH <sub>4</sub> ] <sub>n</sub> -NO <sub>3</sub> | 7.1 ± 0.4     | 800 ± 90         | 17.3 ± 0.4                         | 0.52 ± 0.02 |
| FTO/[Co <sub>2</sub> (6mna) <sub>2</sub> ] <sub>n</sub> -NO <sub>3</sub>        | 8.1 ± 0.1     | 780 ± 10         | 18.2 ± 0.2                         | 0.58 ± 0.01 |
| FTO/[Co <sub>2</sub> (6mna) <sub>2</sub> ] <sub>n</sub> -Cl                     | 8.8 ± 0.3     | 780 ± 120        | 18.6 ± 0.3                         | 0.61 ± 0.01 |
| FTO/Pt                                                                          | 7.7 ± 0.0     | 750 ± 20         | 16.1 ± 0.1                         | 0.64 ± 0.01 |

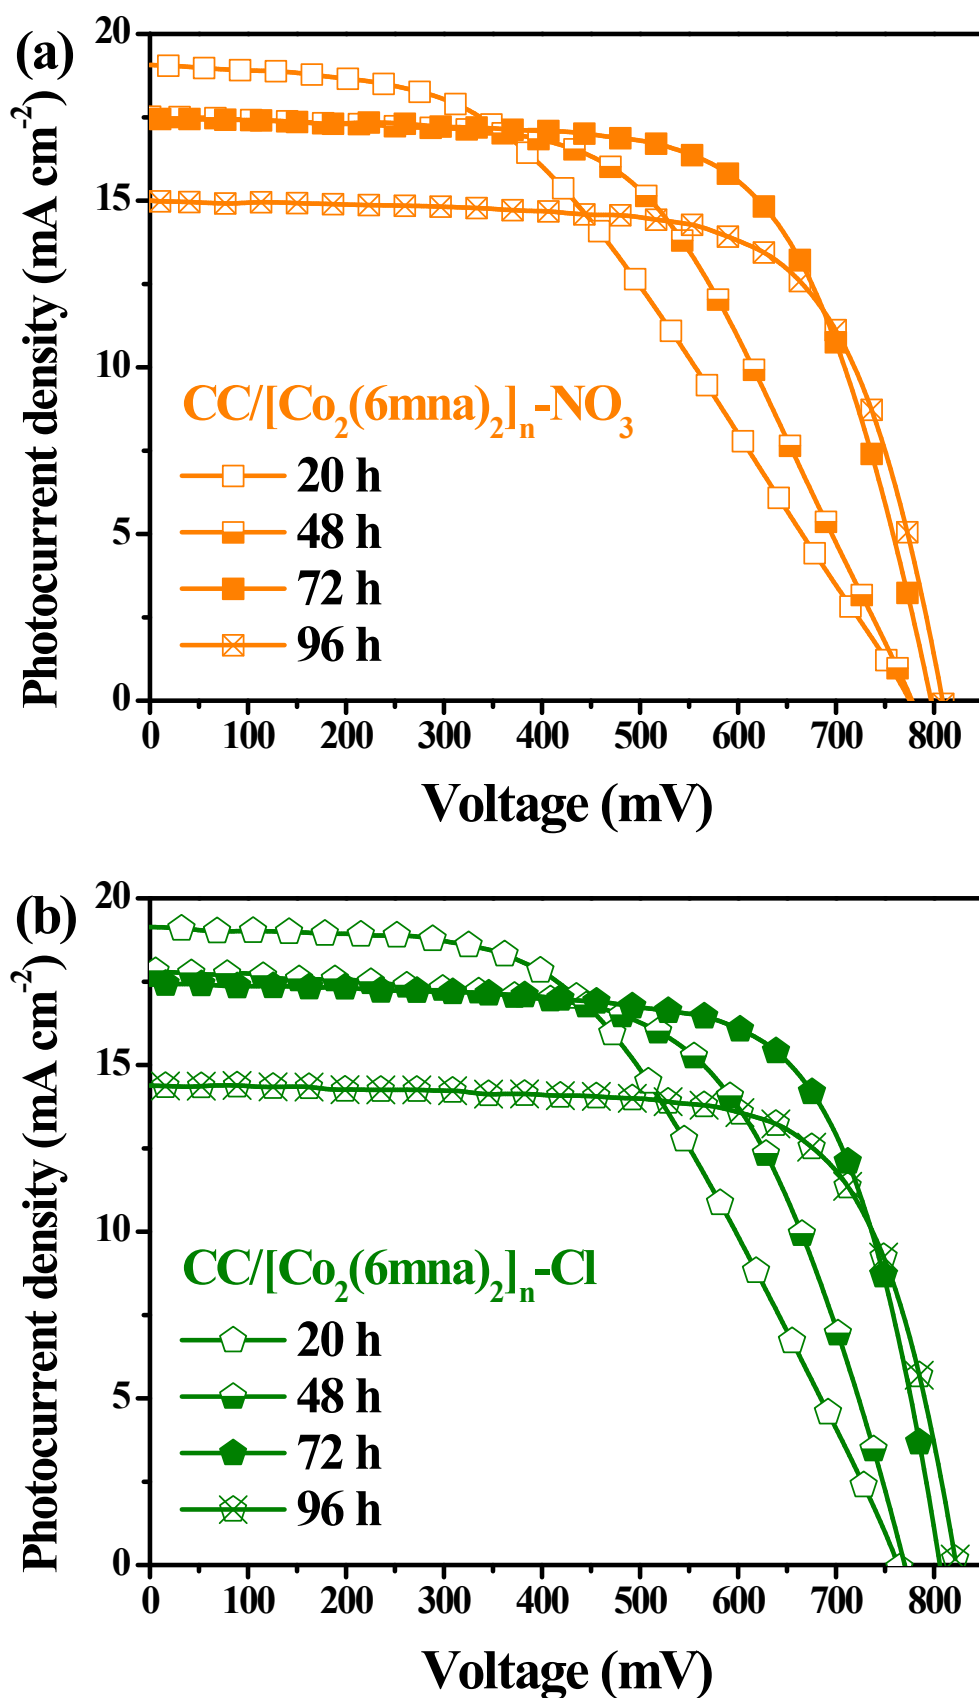

**Fig. S9** Photocurrent density–voltage curves of DSSCs coupled with the counter electrodes of (a) various  $\text{CC}/[\text{Co}_2(6\text{mna})_2]_n\text{-NO}_3$  and (b) various  $\text{CC}/[\text{Co}_2(6\text{mna})_2]_n\text{-Cl}$ , synthesized by different reaction times (20, 48, 72, and 96 h).

**Table S3** Photovoltaic parameters of DSSCs coupled with the counter electrodes of various CC/[Co<sub>2</sub>(6mna)<sub>2</sub>]<sub>n</sub>-NO<sub>3</sub> and CC/[Co<sub>2</sub>(6mna)<sub>2</sub>]<sub>n</sub>-Cl, synthesized by different reaction times.

| Electrode                                                               | Reaction time (h) | $\eta$ (%) | $V_{oc}$ (mV) | $J_{sc}$ (mA cm <sup>-2</sup> ) | $FF$        |
|-------------------------------------------------------------------------|-------------------|------------|---------------|---------------------------------|-------------|
| CC/[Co <sub>2</sub> (6mna) <sub>2</sub> ] <sub>n</sub> -NO <sub>3</sub> | 20                | 6.5 ± 0.2  | 770 ± 130     | 19.0 ± 0.3                      | 0.44 ± 0.00 |
|                                                                         | 48                | 7.8 ± 0.1  | 780 ± 140     | 17.6 ± 0.4                      | 0.57 ± 0.02 |
|                                                                         | 72                | 9.4 ± 0.1  | 800 ± 20      | 17.4 ± 0.1                      | 0.68 ± 0.00 |
|                                                                         | 96                | 8.6 ± 0.4  | 810 ± 140     | 15.1 ± 0.6                      | 0.70 ± 0.00 |
| CC/[Co <sub>2</sub> (6mna) <sub>2</sub> ] <sub>n</sub> -Cl              | 20                | 7.5 ± 0.3  | 760 ± 150     | 19.0 ± 0.3                      | 0.52 ± 0.01 |
|                                                                         | 48                | 8.5 ± 0.3  | 770 ± 140     | 17.9 ± 0.5                      | 0.62 ± 0.01 |
|                                                                         | 72                | 9.9 ± 0.3  | 800 ± 50      | 17.5 ± 0.5                      | 0.71 ± 0.01 |
|                                                                         | 96                | 8.6 ± 0.5  | 820 ± 90      | 14.5 ± 0.7                      | 0.72 ± 0.00 |

**Table S4** Photovoltaic parameters of the DSSCs coupled with the CC/[Cu/Co(6mna)<sub>2</sub>]<sub>n</sub>-Cl counter electrodes, measured by a Philip desk lamp (Helix 23WD EMI) illumination at 0.5, 1.0, 3.0, and 6.0 klux. The standard deviation for each data is based on five independent devices.

| Irradiance (mW cm <sup>-2</sup> ) | $\eta$ (%) | $V_{oc}$ (mV) | $J_{sc}$ (mA cm <sup>-2</sup> ) | $FF$        |
|-----------------------------------|------------|---------------|---------------------------------|-------------|
| 0.16 (0.5 klux)                   | 12.2 ± 0.1 | 580 ± 10      | 0.05 ± 0.00                     | 0.66 ± 0.01 |
| 0.32 (1.0 klux)                   | 19.5 ± 0.1 | 620 ± 0       | 0.15 ± 0.00                     | 0.66 ± 0.00 |
| 0.97 (3.0 klux)                   | 23.3 ± 0.1 | 660 ± 10      | 0.51 ± 0.00                     | 0.67 ± 0.00 |
| 1.95 (6.0 klux)                   | 26.4 ± 0.3 | 680 ± 10      | 1.14 ± 0.02                     | 0.66 ± 0.01 |

**Table S5** Electrochemical properties of the electrodes of CC/[Cu/Co(6mna)<sub>2</sub>]<sub>n</sub>-NO<sub>3</sub>, CC/[Cu/Co(6mna)<sub>2</sub>]<sub>n</sub>-Cl, and CC/Pt in an iodide-based electrolyte at a scan rate of 10 mV s<sup>-1</sup>.

| Electrode                                                    | $J_{pc}$ [mA cm <sup>-2</sup> ] | $E_{sep}$ [mV] |
|--------------------------------------------------------------|---------------------------------|----------------|
| CC/[Cu/Co(6mna) <sub>2</sub> ] <sub>n</sub> -NO <sub>3</sub> | 0.9                             | 417            |
| CC/[Cu/Co(6mna) <sub>2</sub> ] <sub>n</sub> -Cl              | 1.2                             | 306            |
| CC/Pt                                                        | 0.8                             | 474            |

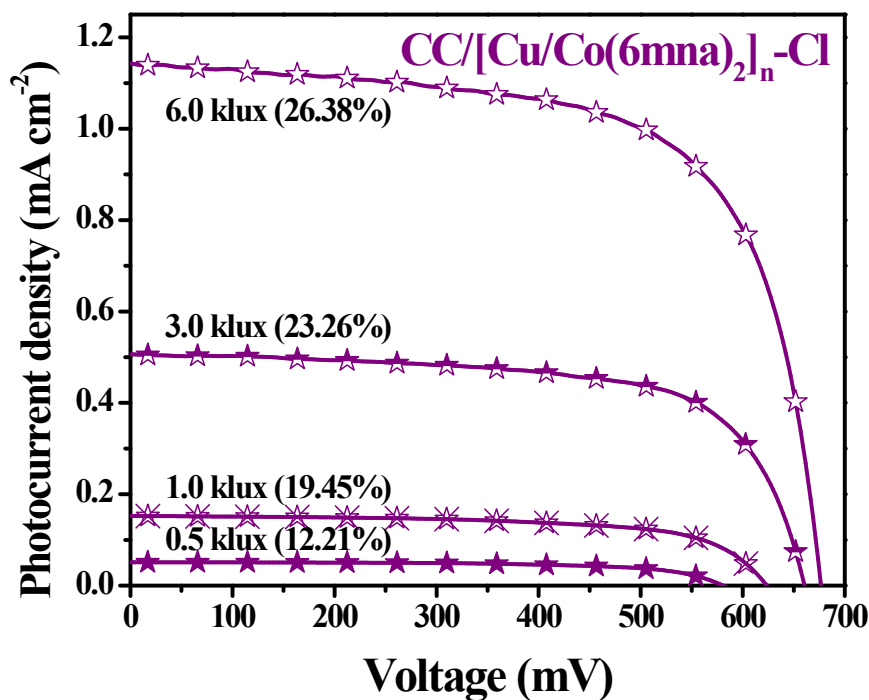

**Fig. S10** Photocurrent density–voltage curves of the DSSCs coupled the optimal CC/[Cu/Co(6mna)<sub>2</sub>]<sub>n</sub>-Cl counter electrodes, measured at room light illumination (Philips TL5, 14W, 6500K).

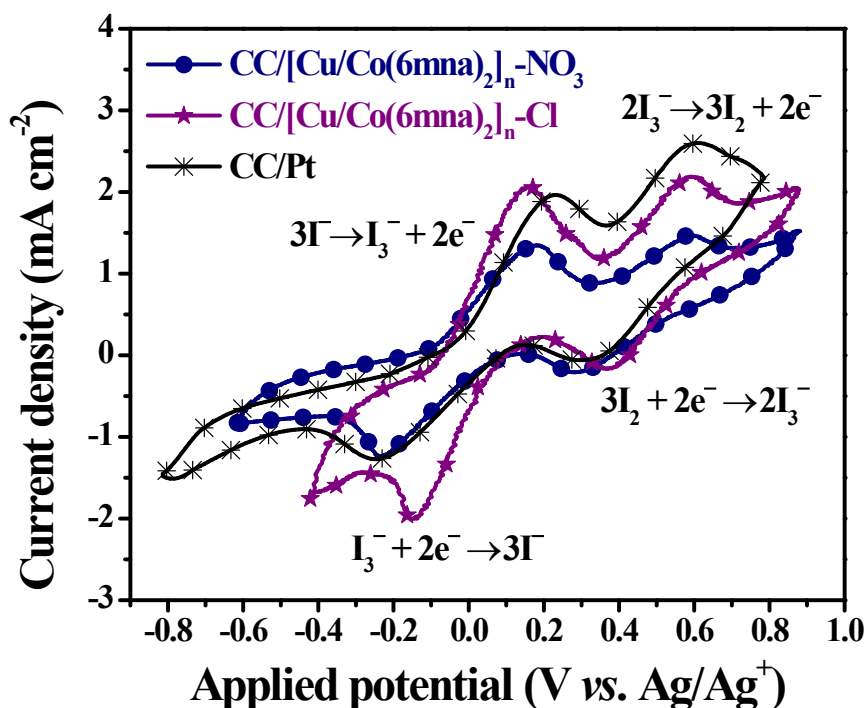

**Fig. S11** Cyclic voltammograms of CC/[Cu/Co(6mna)<sub>2</sub>]<sub>n</sub>-NO<sub>3</sub>, CC/[Cu/Co(6mna)<sub>2</sub>]<sub>n</sub>-Cl, and CC/Pt electrodes, measured in an iodide-based electrolyte at a scan rate of 10 mV s<sup>-1</sup>.

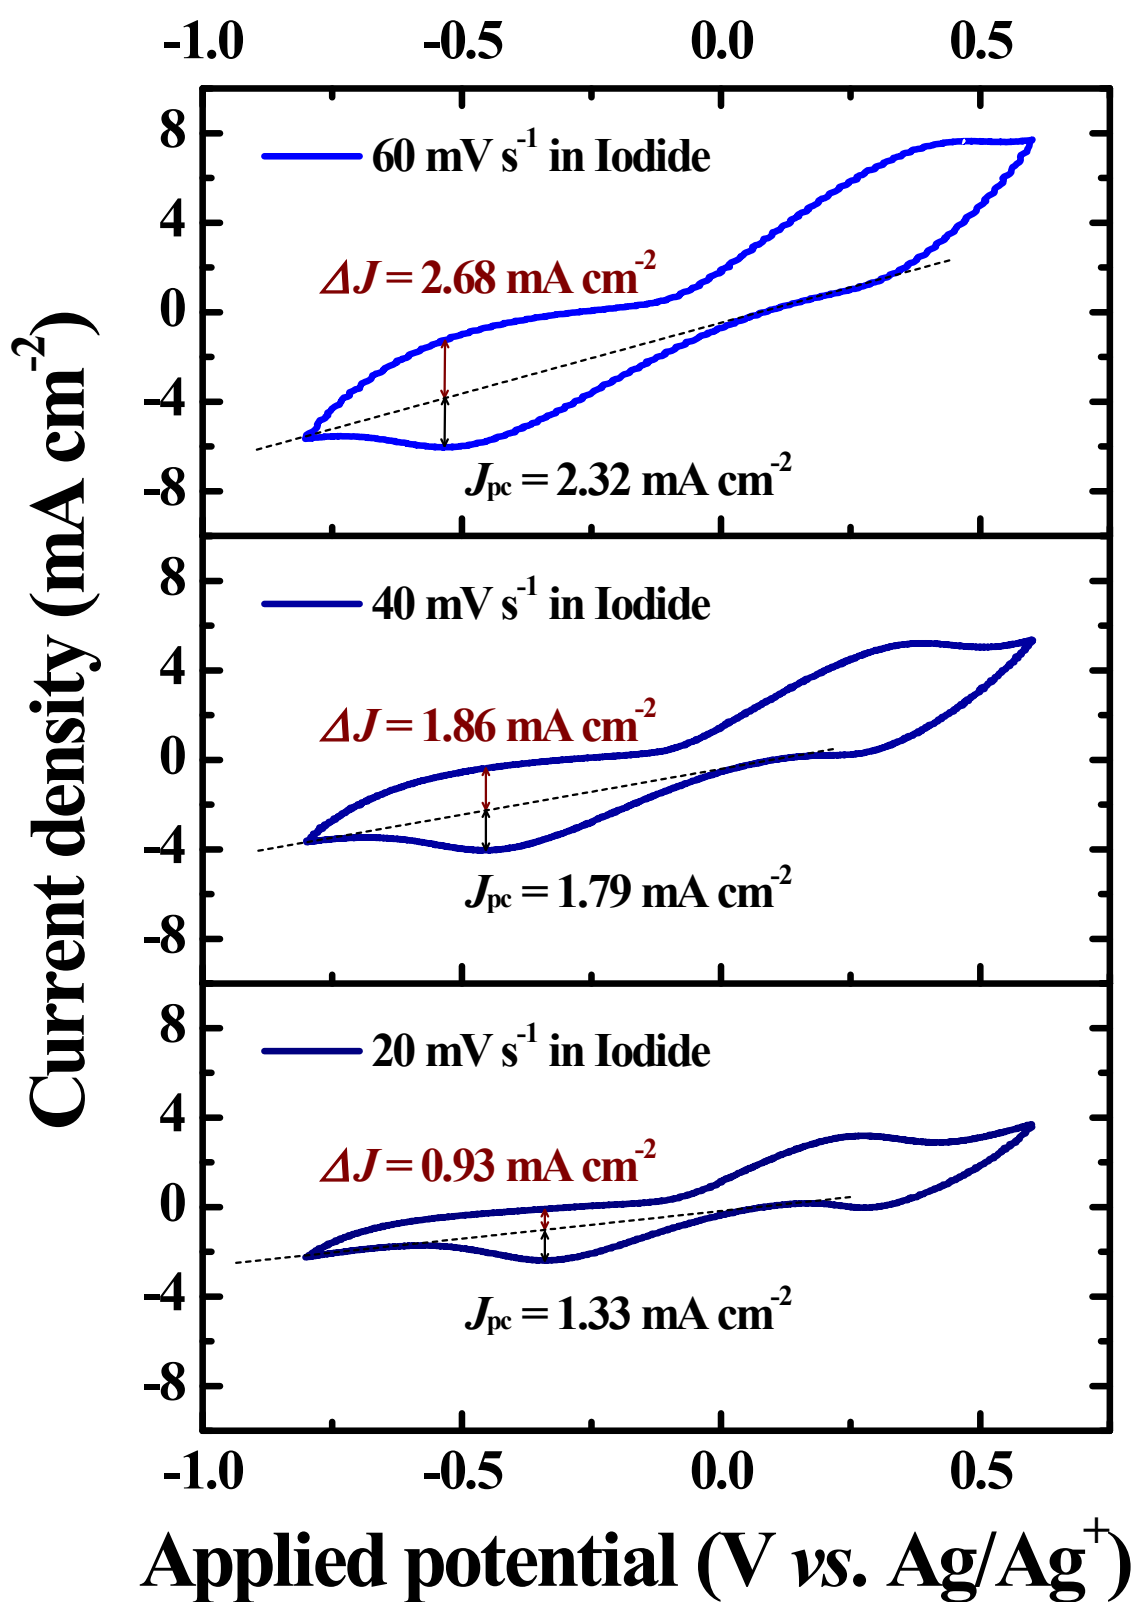

**Fig. S12** Cyclic voltammograms of CC/[Cu/Co(6mna)<sub>2</sub>]<sub>n</sub>-Cl electrode, measured in an iodide-based electrolyte at various scan rates (20, 40, and 60 mV s<sup>-1</sup>).

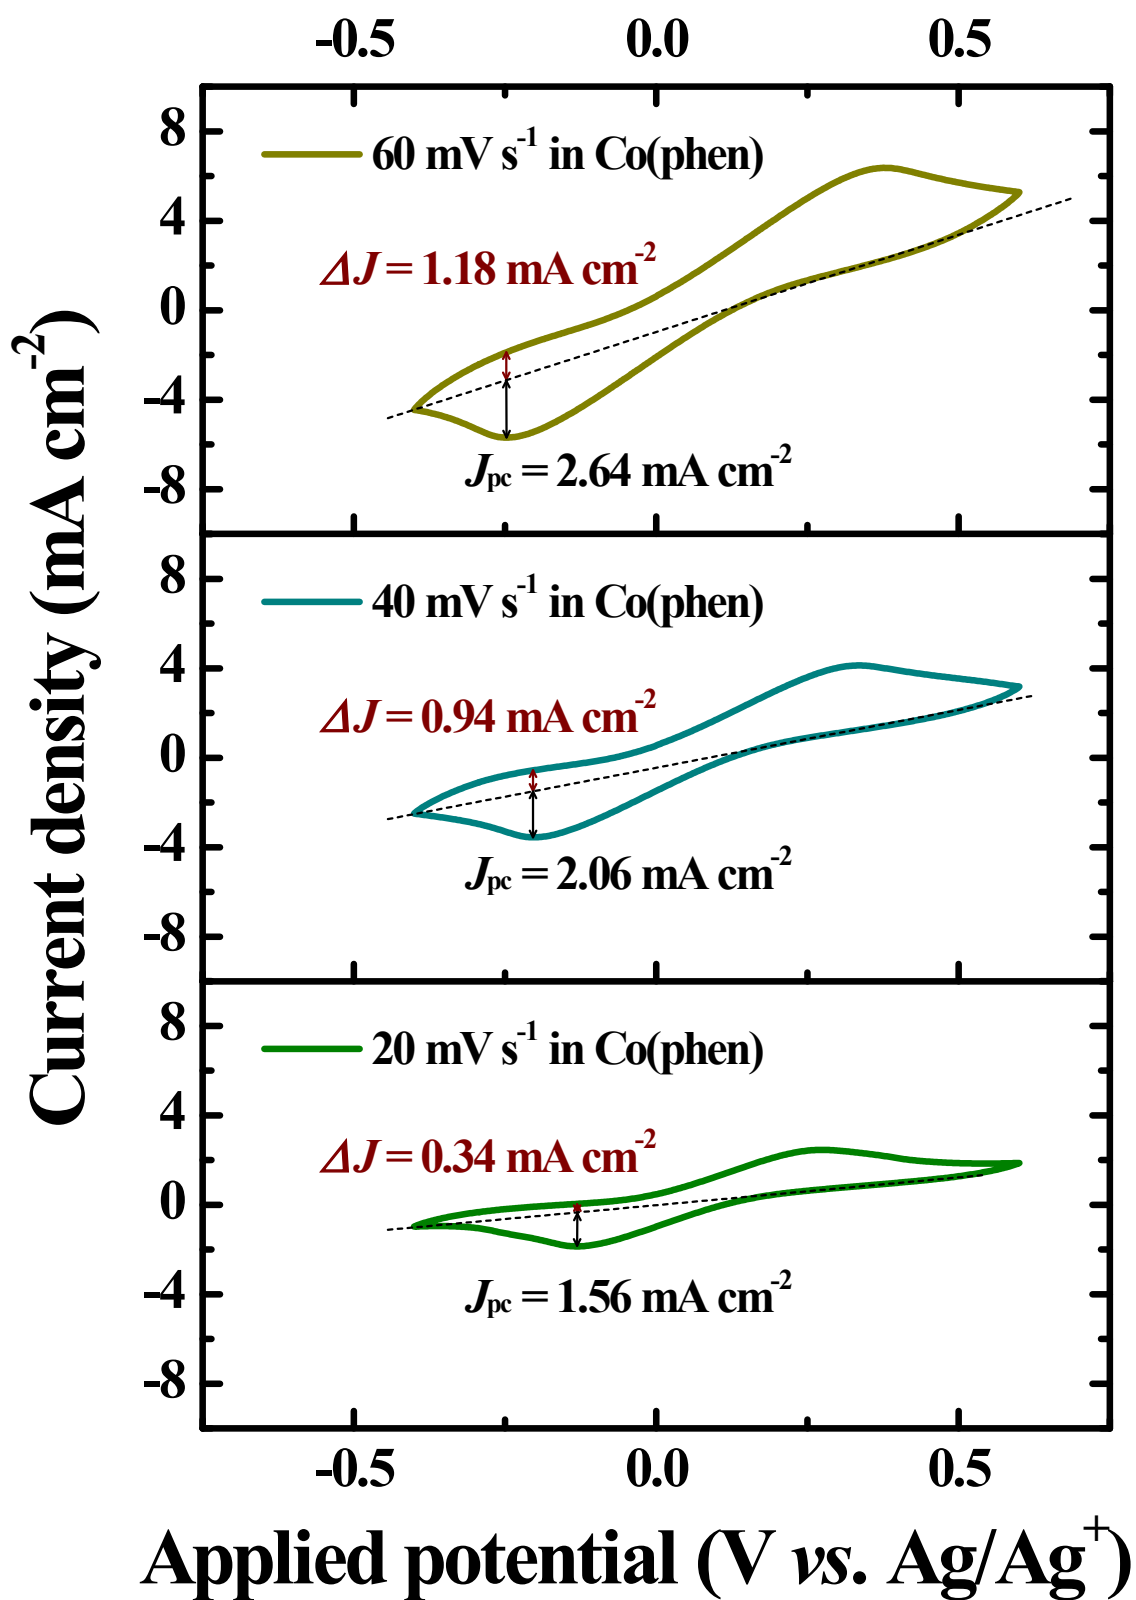

**Fig. S13** Cyclic voltammograms of CC/[Cu/Co(6mna)<sub>2</sub>]<sub>n</sub>-Cl electrode, measured in an Co(phen)-based electrolyte at various scan rates (20, 40, and 60 mV s<sup>-1</sup>).

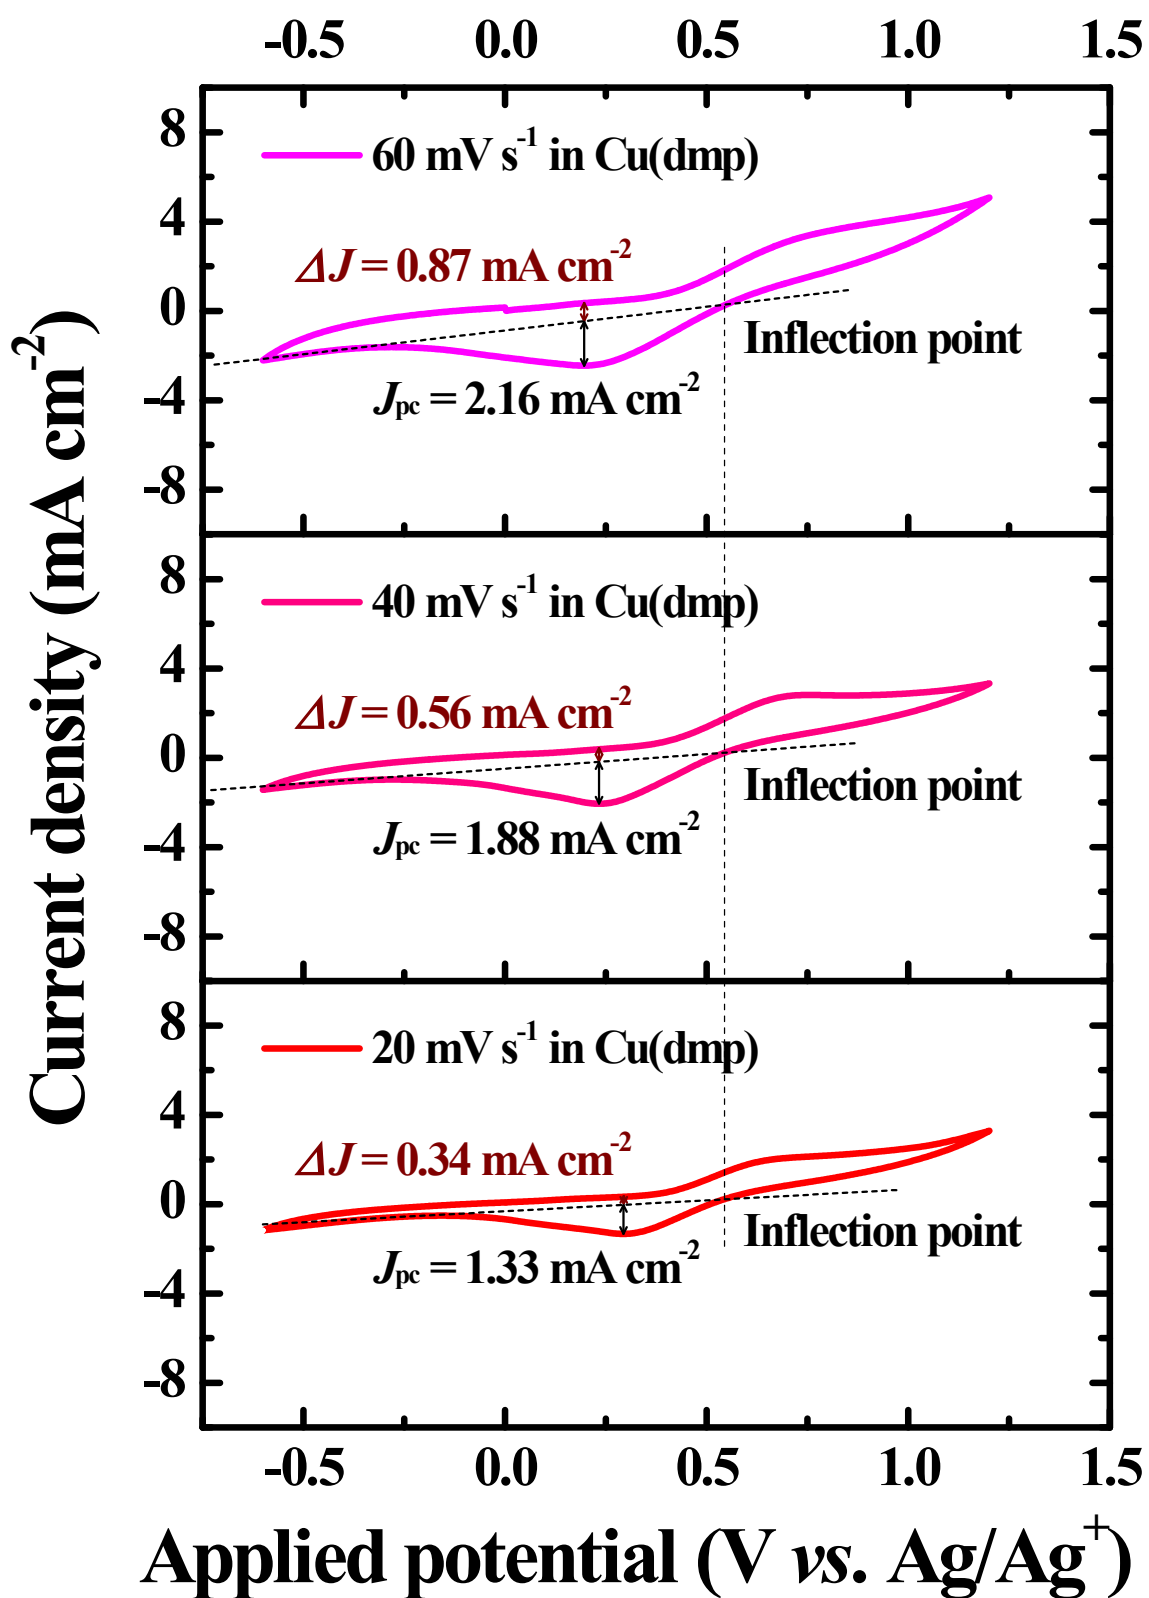

**Fig. S14** Cyclic voltammograms of CC/[Cu/Co(6mna)<sub>2</sub>]<sub>n</sub>-Cl electrode, measured in an Cu(dmp)-based electrolyte at various scan rates (20, 40, and 60 mV s<sup>-1</sup>).

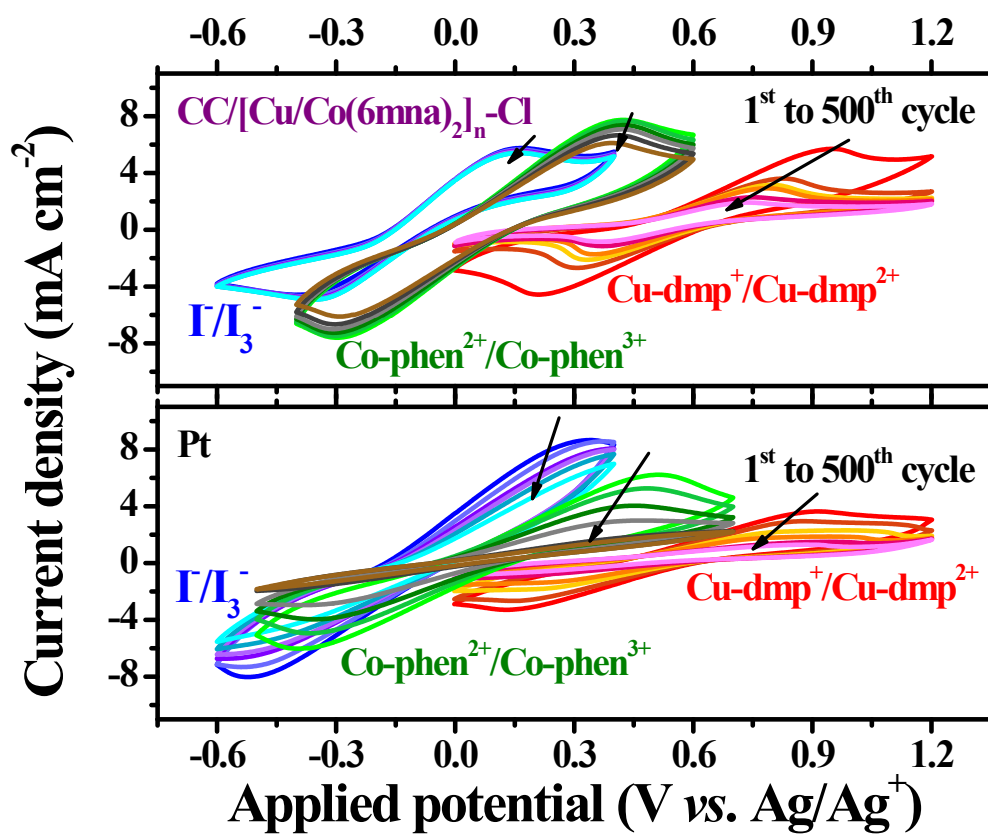

**Fig. S15** Long-term cyclic voltammograms of the CC/[Cu/Co(6mna)<sub>2</sub>]<sub>n</sub>-Cl and CC/Pt electrodes, measured at 100 mV s<sup>-1</sup> in an iodide-based (blue), cobalt-based (green), or copper-based (red) electrolytes.

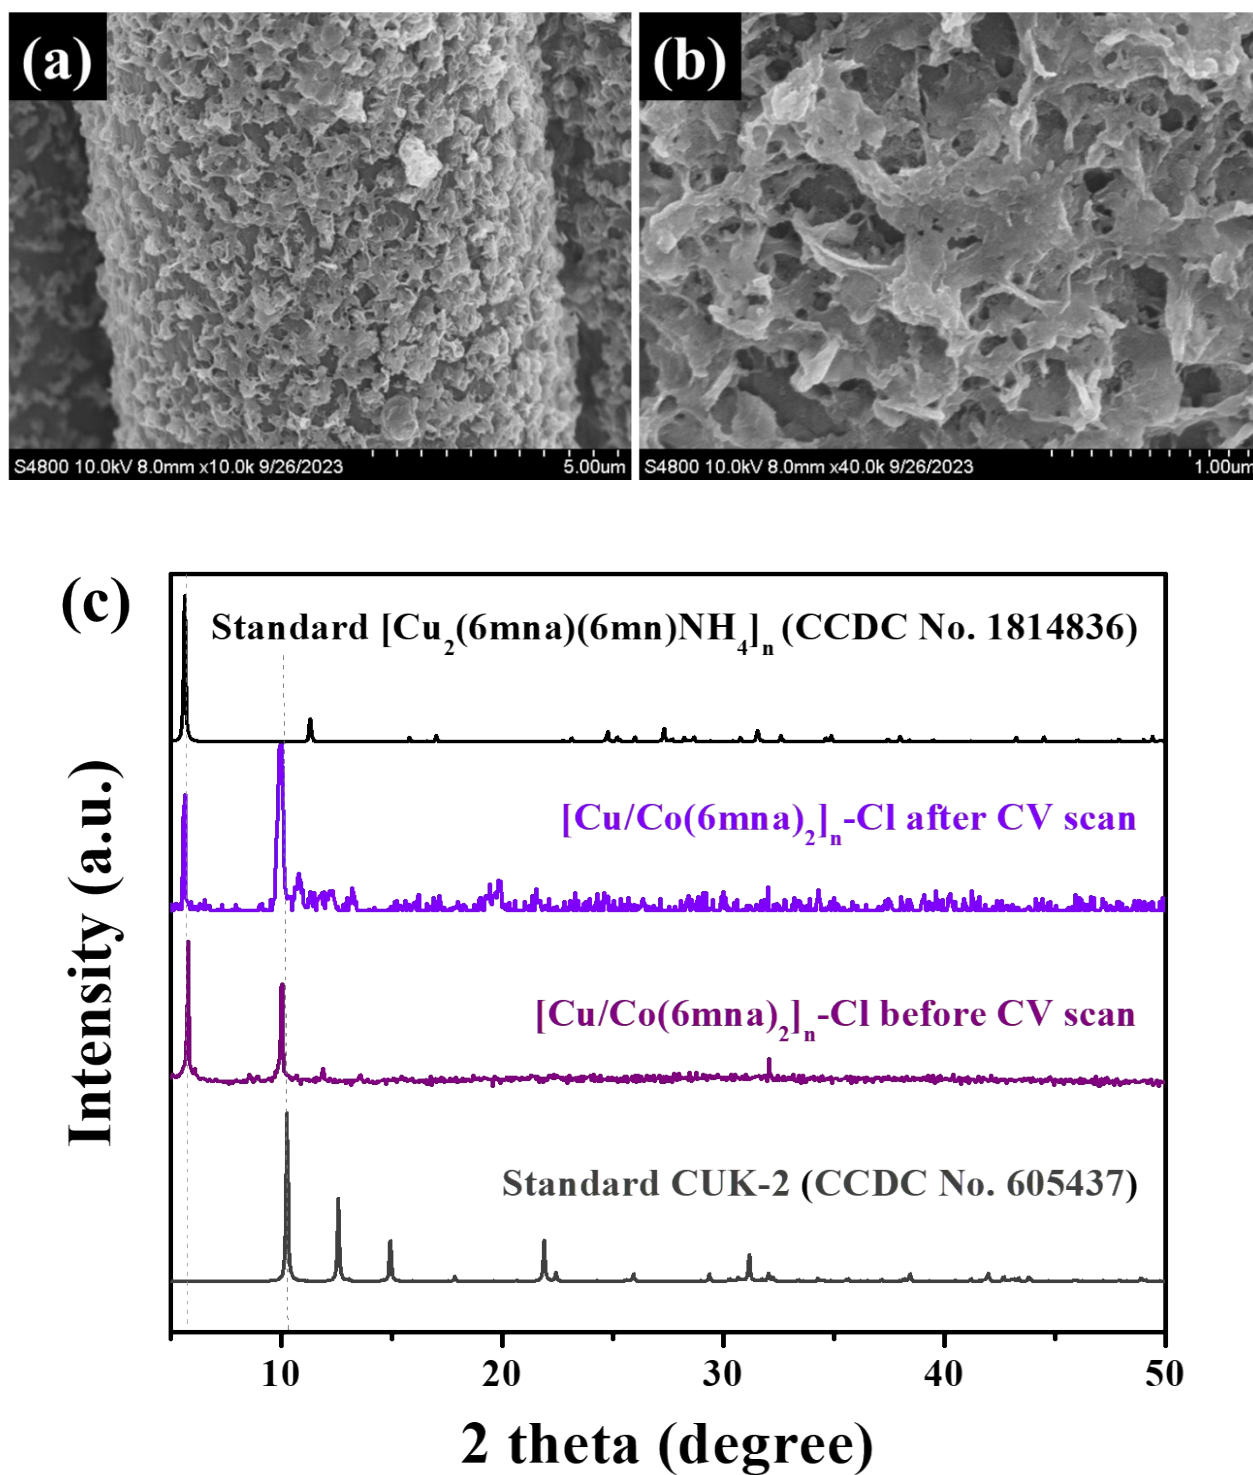

**Fig. S16** FE-SEM images of the CC/[Cu/Co(6mna)<sub>2</sub>]<sub>n</sub>-Cl electrode synthesized by 72 h, recorded after 500 cycles of CV scanning at the magnification of (a) 10 k and (b) 40 k. (c) Powder X-ray diffraction patterns of [Cu/Co-(6mna)<sub>2</sub>]<sub>n</sub>-Cl before (purple line) and after (violet line) long-term CV scan in I<sup>-</sup>/I<sub>3</sub><sup>-</sup>.

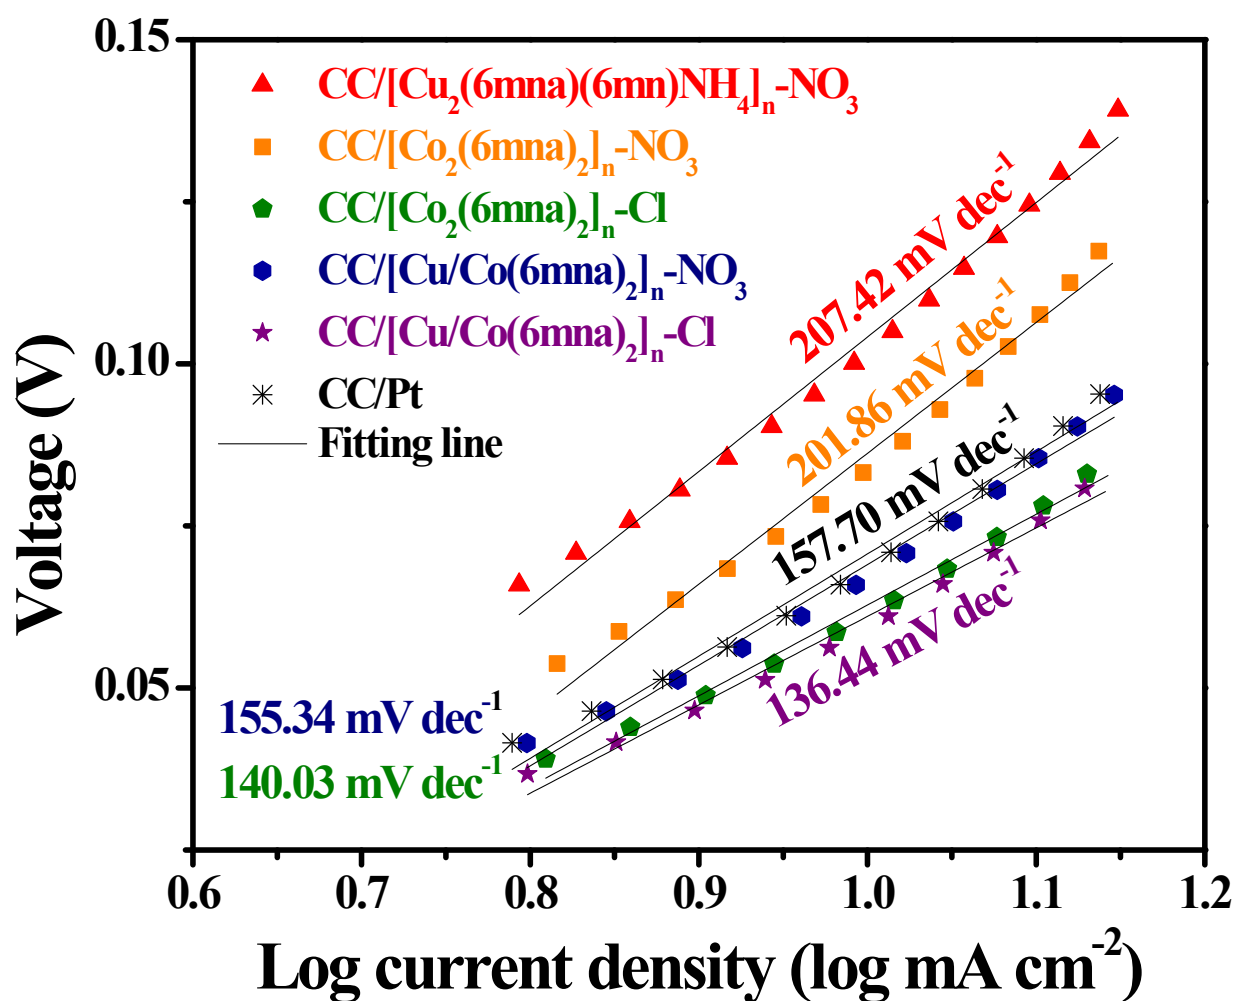

**Fig. S17**  
electrolyte.

Tafel polarization  $V$ -log  $J$  plots for various electrodes, measured in an iodide-based

## References:

1. C.-T. Li, F.-L. Wu, C.-J. Liang, K.-C. Ho, J. T. Lin, *J. Mater. Chem. A*, **2017**, 5, 7586-7594.
2. Y. Saygili, M. Soderberg, N. Pellet, F. Giordano, Y. Cao, A. B. Munoz-Garcia, S. M. Zakeeruddin, N. Vlachopoulos, M. Pavone, G. Boschloo, L. Kavan, J. E. Moser, M. Gratzel, A. Hagfeldt, M. Freitag, *J. Am. Chem. Soc.*, **2016**, 138, 15087-15096.
3. X. Cui, Z. Xie, Y. Wang, *Nanoscale*, **2016**, 8, 11984-11992.
4. S. Huang, S. Li, Q. He, H. An, L. Xiao, L. Hou, *Appl. Surf. Sci.*, **2019**, 476, 769-777.
5. C. Xu, J. Zhang, X. Qian, W. Wu, J. Yang, L. Hou, *Electrochim. Acta*, **2018**, 289, 448-458.
6. W. Wang, Q. Cui, D. Sun, Q. Yang, J. Xu, W. Liao, X. Zuo, H. Tang, G. Li, S. Jin, *J. Mater. Chem. C*, **2021**, 9, 7046-7056.
7. M. Sun, S. Yun, J. Dang, Y. Zhang, Z. Liu, D. Qiao, *Chem. Eng. J.*, **2023**, 458, 141301.
8. A. S. A. Ahmed, W. Xiang, I. Saana Amiinu, X. Zhao, *New J. Chem.*, **2018**, 42, 17303-17310.
9. A. S. A. Ahmed, W. Xiang, Z. Li, I. S. Amiinu, X. Zhao, *Electrochim. Acta*, **2018**, 292, 276-284.
10. J. S. Kang, J. Kang, D. Y. Chung, Y. J. Son, S. Kim, S. Kim, J. Kim, J. Jeong, M. J. Lee, H. Shin, S. Park, S. J. Yoo, M. J. Ko, J. Yoon, Y.-E. Sung, *J. Mater. Chem. A*, **2018**, 6, 20170-20183.
11. S.-L. Jian, Y.-J. Huang, M.-H. Yeh, K.-C. Ho, *J. Mater. Chem. A*, **2018**, 6, 5107-5118.
12. J. Wu, W. Pan, Y. Lin, J. Zhu, Q.-S. Jiang, Y. Zhao, R. Ji, Y. Zhang, *J. Mater. Sci. Mater. Electron.*, **2020**, 31, 12309-12316.
13. M.-S. Wu, J.-C. Lin, *Appl. Surf. Sci.*, **2019**, 471, 455-461.
14. X. Jiang, H. Li, S. Li, S. Huang, C. Zhu, L. Hou, *Chem. Eng. J.*, **2018**, 334, 419-431.
15. J. Ou, J. Xiang, J. Liu, L. Sun, *ACS Appl. Mater. Interfaces*, **2019**, 11, 14862-14870.
16. T. Y. Chen, Y. J. Huang, C. T. Li, C. W. Kung, R. Vittal, K. C. Ho, *Nano Energy*, **2017**, 32, 19-27.
17. Y.-Y. Wang, S.-M. Chen, R. Haldar, C. Wöll, Z.-G. Gu, J. Zhang, *Adv. Mater. Interfaces*, **2018**, 5, 1800985.
18. A. N. Yang, J. T. Lin, C. T. Li, *ACS Appl. Mater. Interfaces*, **2021**, 13, 8435-8444.
